# Supplementary material for: Identification of risk factors associated with carriage of resistant Escherichia coli in three culturally diverse ethnic groups in Tanzania: a biological and socioeconomic analysis
Source: PubMed Central journal article supplement (PMC6215761; doi:10.1016/s2542-5196(18)30225-0), 2018-11
Supplement: mmc1.pdf [file mmc1.pdf]

# THE LANCET

## Planetary Health

### Supplementary appendix

This appendix formed part of the original submission and has been peer reviewed. We post it as supplied by the authors.

Supplement to: Caudell M A, Mair C, Subbiah M, et al. Identification of risk factors associated with carriage of resistant *Escherichia coli* in three culturally diverse ethnic groups in Tanzania: a biological and socioeconomic analysis. *Lancet Planet Health* 2018; **2**: e489–97.

**Identification of risk factors associated with carriage of resistant *Escherichia coli* in three culturally diverse ethnic groups in Tanzania: a biological and socioeconomic analysis**

**Authors:** Mark A Caudell, Colette Mair, Murugan Subbiah, Louise Matthews, Robert J Quinlan, Marsha B Quinlan, Ruth Zadoks, Julius Keyyu, and Douglas R. Call

Appendix

## 1. Materials and Methods

### a. Study Design

We rely heavily from Caudell et. al <sup>1</sup> in our discussion of Materials and Methods where a more thorough treatment of study development can be found. A team of veterinarians, livestock extension officers, microbiologists, ecologists, epidemiologists, social scientists, and local community members negotiated and coordinated the research design, planning, logistics, project implementation, data management, and analysis. Key informants and survey participants were compensated 10,000 Tanzanian Shillings (about \$6.50 USD) for participation (up to 120 min). Research assistants fluent in English, Swahili and Maa or Chagga were trained and employed (Maasai assistants in Maasai and Arusha villages and Chagga assistants in Chagga villages) for data collection and to facilitate participation. Surveys were conducted in *Maa* among Maasai and in *Kiswahili* among Chagga and Arusha. The study was reviewed by Washington State University's and Tanzania National Institute for Medical Research's Review Boards, and research permits were issued by the Tanzania Commission for Science and Technology, Tanzania Wildlife Research Institute, and by regional, district, and ward offices within Arusha, Manyara, and Kilimanjaro regions.

### b. Survey Development

We used a mixed-methods strategy that combined qualitative and quantitative data collection beginning with 20 formal, qualitative, key informant and focus group interviews among Maasai and Chagga livestock owners across a range of communities in 2012. We interviewed livestock extension officers and veterinarians in different communities to determine common practices in different areas and the course of professional veterinary training in Tanzania. We used data from initial interviews to refine our survey instruments. We observed livestock management and veterinary care in multiple Maasai and Chagga households from 2012 to 2015 including use of veterinary antimicrobials, chemical dips, and traditional treatments; necropsy of recently deceased animals, slaughter and butchering, milking and milk handling, breeding, birthing, branding, grazing and fodder provision, and castration. Informal interviews were conducted during the course of direct observation, including conversations that recounted people's health experiences, those of their livestock, and additional detail on the circumstances surrounding illness events. Iterative qualitative interviewing helped to add or modify existing survey instruments as different ethnic groups were studied and as lab results of fecal and milk samples suggested new items for inclusion. We visited multiple animal drug shops in Monduli, Simanjiro, Arusha City and Moshi districts, and interviewed attendants about veterinary antibiotic sales and recommended usage. We held three community meetings after quantitative data collection was complete in those communities. Meetings served as focus groups and opportunities to report our preliminary results. These meetings also allowed us to discuss public health solutions relevant to the study communities. Unless otherwise indicated, our ethnographic description of livestock management and veterinary practices draws on these materials. Formal survey collection began in 2013 and ended in 2015.

#### 1.1. Sampling

Focal villages with sampling season and year are provided in Table S1. Our sample is biased towards data from the dry seasons because of transportation difficulties in the wet season combined with the travel constraints associated with timely processing of milk and fecal specimens.

**Table S1. Number of households surveyed by year, village/ward, season, and ethnicity.**

| Ethnicity        | Village/Ward  | Season  | Year(s)    |
|------------------|---------------|---------|------------|
| Maasai<br>(N=)   | Monduli       | Wet&Dry | 2013/15    |
|                  | Loibor Siret  | Dry     | 2013/15    |
|                  | Terat         | Wet     | 2013       |
|                  | Nadonjukin    | Wet&Dry | 2013/14/15 |
|                  | Loliondo      | Dry     | 2013       |
|                  | Komolo        | Dry     | 2015       |
| Arusha<br>(N=58) | Aremeru ward  | Wet&Dry | 2013/15    |
|                  | Loroi         | Dry     | 2015       |
|                  | Meliot        | Dry     | 2015       |
| Chagga<br>(N=85) | Masaera kati  | Wet&Dry | 2014       |
|                  | Masaera juu   | Dry     | 2014       |
|                  | Mamsera chini | Dry     | 2014       |
|                  | Mamsera juu   | Dry     | 2014       |

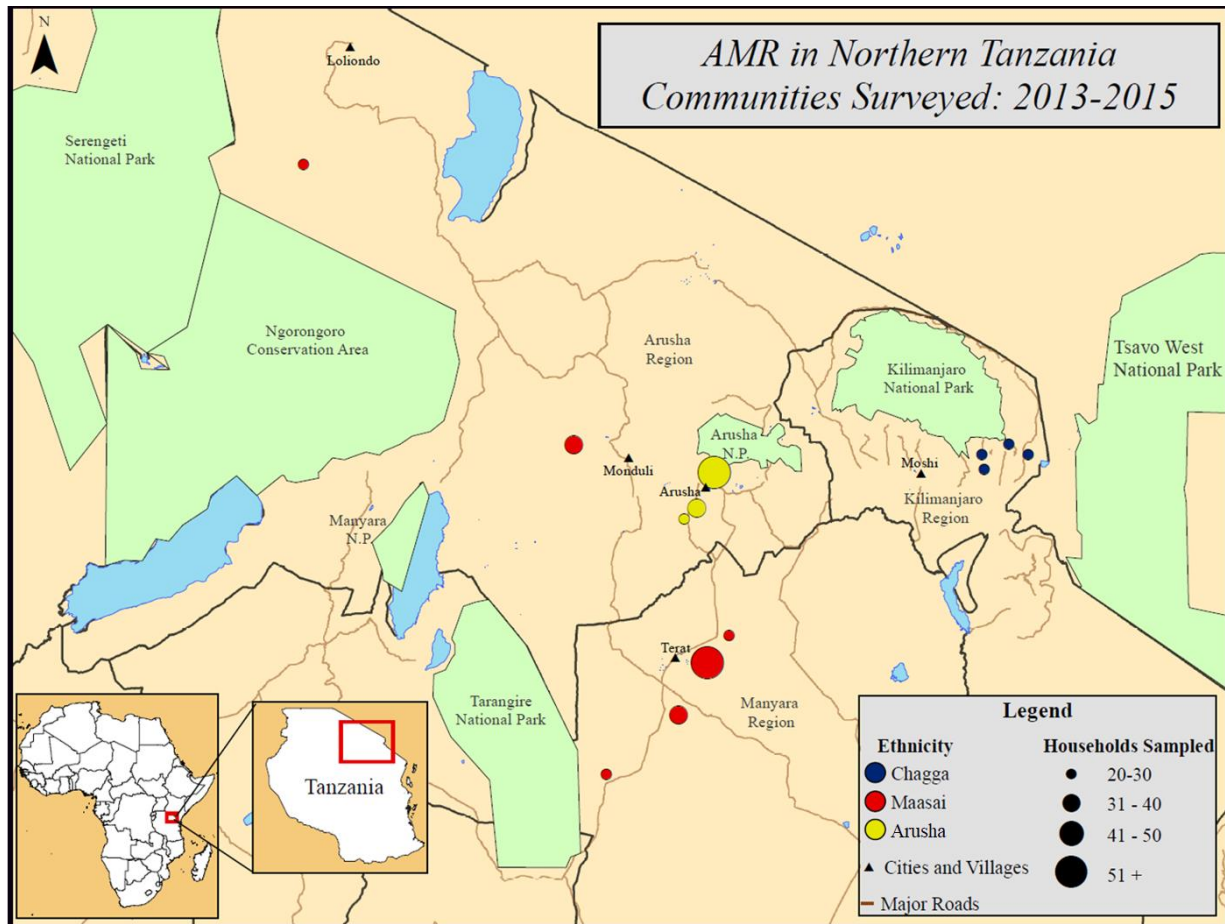

**Figure S1. Map of study location with number of households sampled per village.**

## 2. Lab Methods

### 2.1. Collection and storage of fecal and milk samples

Fecal samples (N=1 per household) were collected from the floor or from the pit toilets and placed into sterile Whirl-Paks. In households with pit toilets (almost every house that had a toilet had drop toilets) a cotton tipped applicator was lowered into the pit. Milk and swab samples were only collected in the final year of survey given preliminary results indicating high levels of resistance in households that consumed large quantities of unboiled milk. A total of 272 milk (n=181) and swab (n = 91) samples were collected across Maasai (n=80) and Arusha households (n=36). Milk samples from cattle, sheep, and goats were collected by pouring milk from collection and storage containers into sterile 50-mL polypropylene tubes. Swab samples were collected by scrubbing the inside of milk containers using moist (~5 mL of water) cotton pads. Swabs were then placed into sterile 50 mL polypropylene tubes. Type of storage containers (calabash, metal, plastic), storage time (if known), and milk type (fresh/sour) were documented. Milk and swab samples were placed into a portable refrigerator that was kept below 5°C and transported to the Nelson Mandela African Institution of Science and Technology (NM-AIST) in Arusha, Tanzania. Upon reception at NM-AIST, the fecal samples were diluted in approximately 9 parts of sterile water; glycerol was added (15% volume/volume final concentration) to a 1-mL aliquot of fecal slurries and were stored at -80°C.

## 2.2. Isolation and shipping of putative *E. coli*

The fresh fecal slurry was serially diluted into sterile water and multiple dilutions were plated onto MacConkey agar (Becton, Dickinson and Company, Sparks, MD) plates using sterile glass-beads for the isolation of presumptive *E. coli* isolates (based on colony morphology). We normally picked 48 isolates per sample, although there was some variation due to limited recovery or when houses were sampled more than once (Fig. S2A). This methodology generated a comparable degree of phenotypic diversity between groups (Fig. S2B, see antibiotic testing details below). Isolates were picked by using sterile tooth-picks and inoculating these individually into the wells of 96-well assay plates containing 150  $\mu$ L/well of LB (Luria-Bertani, Becton, Dickinson and Company, Sparks, MD) broth. After inoculation, the plates were covered with lids and wrapped in cling-wrap papers and incubated overnight at 37°C. After incubation on MacConkey plates, glycerol was added to the original plates and stored at -80°C. These isolates were shipped to the laboratory at Washington State University in Pullman, WA using the following protocol: a duplicate 96-well culture plate containing 40  $\mu$ L of LB broth was prepared using 96-pin replicator. These plates were incubated for 10-12 h at 37°C; the lids were removed and the plates with culture were air-dried in the incubator for up to 24 h. The plates containing desiccated cultures were covered with lid, stacked, put in the cardboard boxes and left at the room temperature for 1-2 weeks. The plates were checked for condensation during this storage period and, if absent, were then shipped to Washington State University (WSU, Pullman, WA, U.S.A.). If condensation was noted, plates were disposed and prepared again.

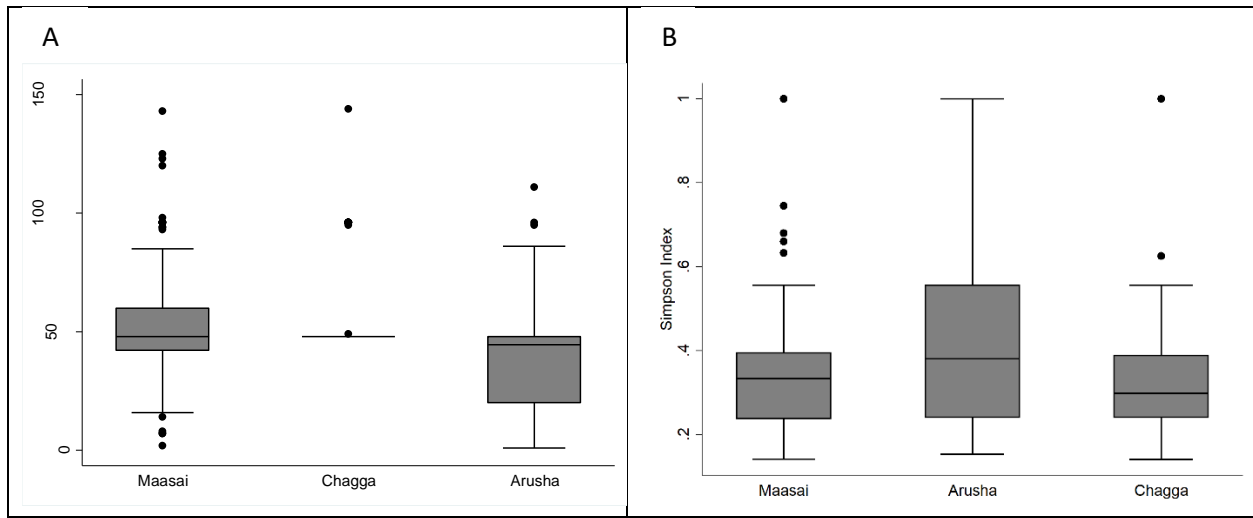

**Figure S2.** A) Box plots of isolates per household across ethnic groups. B) Box plots of Simpson's Index across ethnic groups.

The dried presumptive *E. coli* cultures from the 96-well assay plates were recovered at the WSU laboratory by adding 150  $\mu$ L of LB broth into each well of the plates and incubating overnight at 37°C. Duplicate working plates were prepared from the original plates; glycerol was added to the original plates and stored at -80°C. The identity of  $n = 800$  presumptive *E. coli* isolates was confirmed by their colony morphology on MacConkey agar (streaking those isolates on MAC plates) and by testing for the presence of *uidA* marker using a PCR assay<sup>2</sup>. As part of a related project, we later conducted whole-genome sequencing for 183 putative *E. coli* isolates from four Maasai households, of which 90.7% were *E. coli* and 7.7% were *Enterobacter cloacae* and for 25 putative *E. coli* isolates from waters, of which 92% were *E. coli* and 8% were *Enterobacter cloacae*.

## 2.3. Estimating the load (bacteria per ml) and isolation of lactose fermenting bacteria in milk

Milk samples transported to the NM-AIST laboratory where they were serially diluted (10-fold) by using sterile phosphate buffered saline; scrubbed swab samples were multiple times squeezed between fingers inside the Whirl-Paks. Milk samples (50 µl from 10<sup>0</sup> to 10<sup>-2</sup> dilutions) and undiluted swab extracts were plated on to MacConkey agar plates by using sterile glass-beads and then incubated overnight at 37°C in a stationary incubator. After 24 h the plates were examined for the presence of presumptive *E. coli* and/or other lactose-fermenting bacteria. When tested in this manner, the abundance of *E. coli* was limited in the milk samples and hence, the number of Gram-negative lactose-fermenting colonies was enumerated. The bacterial load (log<sub>10</sub>) was estimated per mL of milk. The undiluted milk and swab samples were stored at -80°C for future use. A related whole-genome sequencing project from four Maasai households indicated that milk isolates were composed of approximately 21.7% and 68.3% *E. coli* and *E. cloacae*, respectively, while swab isolates included 9.5% *E. coli*, 34.4% *E. cloacae* and 35.1% of *Klebsiella* sp.

#### 2.4. Estimating the bioavailability of oxytetracycline residues in milk

To determine if single boiling events can affect the biological activity of oxytetracycline residues in milk, we used a competition experiment between a resistant [SSuT-6; (22)] and an isogenic susceptible *E. coli* strain (the resistance genes were deleted). Briefly, milk (100 mL, pasteurized, homogenized) was transferred into sterile conical flasks and then supplemented with oxytetracycline [0.5 µg/mL final concentration before being serially diluted (2-fold) to attain 0.25 and 0.125 µg/mL concentrations]. Aliquots (5 ml) from each dilution were transferred into 15-mL polystyrene tubes and the remaining milk was heated until boiling for approximately 2-3 min. Boiled milk was cooled to room temperature and 5 mL aliquots were prepared. Drug-resistant or susceptible *E. coli* culture (isogenic strains) were added to every aliquot to a final concentration of approximately 6 log<sub>10</sub> cfu/mL after which the milk samples were incubated at 37°C for 24 h. After incubation, the colony forming units of resistant and susceptible *E. coli* were enumerated on MacConkey agar plate with and without oxytetracycline (16 µg/mL). The colony forming units were log<sub>10</sub> transformed and competitive indices were calculated using the following formula (23). Competitive Index (CI) = (X-Y) / (X+Y), where X – number of resistant and Y – number of susceptible *E. coli* populations. Values >0 indicate that the resistant strain was numerically dominant while values <0 indicate that the susceptible strain dominated.

### 3. Data analyses and results

#### 3.1. Risk factors for AR bacteria in people.

##### a. Lasso Models

The Lasso is a shrinkage and variable selection method. It minimizes the usual sum of squared errors bounding the sum of the absolute values of regression coefficients. Variable selection can be notoriously difficult for high dimensional data (the number of variables exceeds the sample size) or highly correlated variables with different magnitudes<sup>3-5</sup>. As a result, various regularization approaches have been widely used. In this case, the data are not high dimensional but some variables are highly correlated. To this end, we adopted the method originally proposed by Wang et. al. over a range of penalties<sup>4</sup>, shown to be effective in the low dimensional setting<sup>6</sup>.

Let N denote the number of isolates and P the number of variables. A number of bootstraps B and a range of penalty parameters  $\Lambda$  were chosen. We note that the choice of  $\Lambda$  is typically not influential on the results<sup>4</sup> and we chose the minimal value using a simple permutation test to ensure that any relationship between our variables and the response was stronger than if these relationships occurred by chance<sup>7</sup>. Our maximum penalty parameter was chosen such that at least one variable had a non-zero coefficient.

All continuous variables were standardized before all analyses. For each ethnic group separately, variables with a high proportions of missing values or with no variability were excluded before analysis. We chose a 5% cut

off threshold for missing data in order to retain as many variables as possible while minimizing exclusion of households.

The algorithm employed was as follows:

For each  $\lambda \in A$ ,

For the first bootstrap iteration ( $b = 1$ ),

**Step 1** Draw a random subsample of size  $[N/2]$  without replacement <sup>4</sup>.

**Step 1a** Randomly select a subset of  $q$  variables such that  $q < P$ . We set coefficient estimates of those variables not selected equal to 0.

**Step 1b** For the selected  $q$  variables, obtain regression coefficients  $\widehat{\beta}_1^\lambda$  using the R package glmmLasso <sup>8</sup>.

For  $b = 2, \dots, B$ ,

**Step 2** Estimate the importance of each variable ( $p=1, \dots, P$ ) <sup>3</sup> where importance is given by

$$I_{b,p}^\lambda = (b - 1)^{-1} \sum_{r=1}^{b-1} |\widehat{\beta}_{r,p}^\lambda|.$$

**Step 2a** Estimate selection probabilities of each variable, where the selection probability is given by

$$SP_{b,p}^\lambda = \frac{I_{b,p}^\lambda}{\sum_{p=1}^P I_{b,p}^\lambda}.$$

**Step 3** Draw a random subsample of size  $[N/2]$  without replacement.

**Step 3a** Select a subset of  $q$  variables such that  $q < P$  using selection probabilities  $SP_{b,r}^\lambda$ . The value of  $q$  was allowed to change at each bootstrap iteration. We set coefficient estimates of those variables not selected equal to 0.

**Step 3b** For the selected  $q$  variables, obtain penalised regression coefficients  $\widehat{\beta}_b^\lambda$ .

**Step 4** After  $B$  bootstraps, use a parametric test for variable selection (PSTVSboot) adopted by Park et al (5) to formally select variables. We set if variable  $p$  was included using regularisation  $\lambda$  and if variable  $p$  was not included using regularisation  $\lambda$ .

**Step 5** For each  $p=1, \dots, P$ , inclusion probabilities were estimated as

$$IP_p = \frac{\sum_{\lambda \in A} D_p^\lambda}{|A|}.$$

#### b. Variables entered into Lasso Models

A list of the 56 variables initially entered into each Lasso model is given in Table 3. Results of lasso selection are provided for all groups combined (Fig. 1a) and for each ethnic group separately (Fig1b-Fig1d). Odds ratios (OR) for the best fit models (assessed using the Akaike information criterion) are reported in Table 4a-Table 4c.



**Table S2. Descriptions of the 56 variables used in the random Lasso regression models.**

| <b>Variable name</b>        | <b>Variable description</b>                                                                                                                                                              |
|-----------------------------|------------------------------------------------------------------------------------------------------------------------------------------------------------------------------------------|
| abruse_scale                | A scale of antimicrobial use (see “Scaling Antimicrobial Use” below for further description)                                                                                             |
| abruse_comp1                | Component 1 of PCA (see “PCA of Antimicrobial Use” below for further description)                                                                                                        |
| abruse_comp2                | Component 2 of PCA (see “PCA of Antimicrobial Use” below for further description)                                                                                                        |
| boil_milk                   | A dichotomous variable indicating whether the household reported boiling milk                                                                                                            |
| prof_modern                 | A dichotomous variable indicating whether the household purchased biomedical livestock medicine (antimicrobials) from a professional veterinary service.                                 |
| prof_vacc                   | A dichotomous variable indicating whether the household purchased vaccines from a professional veterinary service.                                                                       |
| child_mort                  | Whether the household had any children that didn't survive until one years of age                                                                                                        |
| children_under_5_vaccinated | A dichotomous variable indicating whether children under 5 within the household received vaccinations                                                                                    |
| communal_graze              | A dichotomous variable indicating whether the household had access to communal grazing lands                                                                                             |
| milk_consume_sick           | A dichotomous variable indicating whether the household reporting consuming milk from sick cows.                                                                                         |
| disease_of_herd             | A dichotomous variable indicating whether a household eats animals that die (1) or do not eat (0), which includes skin and bury, bury without skinning, burn, or cook for dogs and pigs. |
| purchase_distance           | A dichotomous variables indicating whether a household reported that disease factors limited them from increasing their herd size.                                                       |

|                           |                                                                                                                                                                                                               |
|---------------------------|---------------------------------------------------------------------------------------------------------------------------------------------------------------------------------------------------------------|
| village_distance          | distance from household to the nearest village in km                                                                                                                                                          |
| eat_meat_weekly           | A dichotomous variable indicating whether the household ate meat (either beef, goat, chicken, or pig) 3 or more times a week (coded 1) or less than three times a week (coded 2)                              |
| education                 | Education level was recorded for the household head and included none, some primary, completed primary, some high school, completed high school, some college, completed college, and postgraduate and above. |
| ethnic                    | Ethnic group include Maasai (1), Arusha (2), and Chagga (3)                                                                                                                                                   |
| recent_illness_num        | The number of livestock who were sick during the most recent disease outbreak                                                                                                                                 |
| antimicrobials_present    | A dichotomous variable indicating whether the household had veterinary antimicrobials on the premises.                                                                                                        |
| livestock_contact         | Whether livestock came in contact with livestock from other households when grazing or taking water.                                                                                                          |
| water_sharing_animals     | Whether water sources were shared with livestock and wildlife or were for people only                                                                                                                         |
| market_number             | The number of markets used to sell or buy livestock                                                                                                                                                           |
| milk_consume              | Liters of milk consumed by the household. In the Maasai consumption was reported at the boma level (multiple household units) so liters were divided by number of households.                                 |
| min_to_health_center_foot | The number of minutes it takes a healthy person to walk to the nearest health clinic/hospital.                                                                                                                |
| move_livestock_normal     | Number of times a household moved their livestock in a normal year. Options included 0-6 and NA for households that did not have livestock.                                                                   |
| livestock_distance_normal | Distance livestock are moved in a normal year (e.g. to a temporary boms). Options include: less than one day walk, 1-2 days, 3-4 days, more than 4 days and N/A.                                              |

|                          |                                                                                                                                                                                        |
|--------------------------|----------------------------------------------------------------------------------------------------------------------------------------------------------------------------------------|
| no_boil_milk_consumption | Liters of milk consumed in household that reported not boiling milk                                                                                                                    |
| dead_calves              | The number of calves born dead in the last year as reported by the household                                                                                                           |
| cattle_managed           | Reported number of cattle the household was managing for someone else.                                                                                                                 |
| health_care_visits       | Number of reported times any household member visited a health clinic or hospital in the last three months. Options were: 0-1 time, 2-4 times, 5-10 times, 11-20 times, Over 20 times. |
| kids_dead                | Reported number of kids born dead in the last year                                                                                                                                     |
| cattle_purchased         | Reported number of cattle the household purchased last year                                                                                                                            |
| shoats_purchased         | Reported number of sheep and goats the household purchased last year.                                                                                                                  |
| livestock_purchascd      | Reported number of cattle, sheep and goats the household purchased last year                                                                                                           |
| livestock_exchange       | Reported number of people that the household exchanged livestock with in the last year, this could include livestock traders, family, friends, and in-laws (bride-wealth payment)      |
| shoats_managed           | Reported number of sheep and goats the household was managing for someone else.                                                                                                        |
| livestock_managed        | Reported number of cattle, sheep and goat the household was managing for someone else.                                                                                                 |
| prof_serv                | Whether the household reported using a professional veterinary service in the last year,including veterinarian and livestock officer                                                   |
| season                   | Season of data collection. The long rainy season is normally from beginning of March to end of May. Tong dry season is normally from the beginning of June to the end of November      |

|                                   |                                                                                                                                                                                                                                                                                                                                                                                                                                                       |
|-----------------------------------|-------------------------------------------------------------------------------------------------------------------------------------------------------------------------------------------------------------------------------------------------------------------------------------------------------------------------------------------------------------------------------------------------------------------------------------------------------|
| disease_avoid                     | Self-reported number of steps taken to avoid livestock disease. These steps include: (1) Keep calves separate (2) Make a shed or pen to prevent contact from other domestic and wild animals, (3) Keep new cattle separately, (4) Graze sick cattle separately, (5) Feed supplementation (6) Buy new cattle from local area (7) Vaccination, (8) Seek professional veterinary services, (9) Use traditional treatment, and (10) spraying for disease. |
| sickness_interrupt                | Self-report response to “has sickness in your herd reduced the time available for other business/work in the last year                                                                                                                                                                                                                                                                                                                                |
| toilettype                        | Toilet type was a dichotomous variables indicating whether the households had a toilet(1) or not (0). Pit, trench and flush toilets were coded as toilets. Bathroom locations that were in the bush, even if in a dedicated location, were coded as Bush (0)                                                                                                                                                                                          |
| livestock_away                    | The total number of livestock that are kept away from the bomas/household for extended periods of time. Livestock kept away include cattle, sheep, and goats. In the Maasai, for example, livestock are often kept at temporary bomas many kilometers away from the boma.                                                                                                                                                                             |
| livestock_home                    | The total number of livestock that leave the boma/household in the morning and return at night after grazing. Livestock includes cattle, sheep, and goats.                                                                                                                                                                                                                                                                                            |
| livestock_inout                   | The total number of livestock that stay in the boma/household all day. Livestock includes cattle, sheep, and goats.                                                                                                                                                                                                                                                                                                                                   |
| total_birds                       | The total number of chickens owned by the household, this includes cocks and hens                                                                                                                                                                                                                                                                                                                                                                     |
| dogs_number                       | The total number of dogs that the household owned.                                                                                                                                                                                                                                                                                                                                                                                                    |
| urban                             | Composite of whether the household had electricity (mainline or solar) and the number of items the household owned indicative of a more urban lifestyle, including radio, television, refrigerator, motorcycle/scooter, car truck and cell phones                                                                                                                                                                                                     |
| use_antimicrobial_illness_1_human | A dichotomous variable indicating whether the most recent exotic medicine reported was an antimicrobial or non-antimicrobial.                                                                                                                                                                                                                                                                                                                         |
| vet_seek                          | Self-report response to “Do you consult a veterinarian or other livestock care professional when your animals are sick?”<br>Coded 1 Yes 0 = NO                                                                                                                                                                                                                                                                                                        |

|                  |                                                                                                                                                                                                                                                                                                                               |
|------------------|-------------------------------------------------------------------------------------------------------------------------------------------------------------------------------------------------------------------------------------------------------------------------------------------------------------------------------|
| vaccine          | Self-report response on the number of different vaccinations (e.g. foot and mouth disease, East Coast Fever)                                                                                                                                                                                                                  |
| waterhole_number | Reported number of water holes used by household for livestock.                                                                                                                                                                                                                                                               |
| Share_water      | Whether the household reported water sources that were shared (communal well, lake/ river water/seasonal stream) or not shared (stand pipe/private well/pay for delivery/neighbor stand pipe).                                                                                                                                |
| water_treatment  | Whether the household reported treating their drinking water. Treatments included boiling and chemical treatments.                                                                                                                                                                                                            |
| withdrawal       | Whether the household reported observing withdrawal from antimicrobials. Options were using products after: the animal was healthy, 10 days after treatment, 3 days after treatment, and immediately after. Immediately was coded as not observing withdrawal (0) and all other options were recoded as observing withdrawal. |
| village_distance | Distance from households to the nearest village                                                                                                                                                                                                                                                                               |
| total_dead       | Due to low livestock sizes in Chagga households, we combined dead_calves and kids_dead additively to create a variables which gives the reported total number of kids and calves born dead.                                                                                                                                   |

### c. Scaling Veterinary Antimicrobial Use

We developed a scale of veterinary antibiotic use by combining self-report items and direct observation of antibiotics on-hand in the household (see Table 4). Self-reported indicators of lay veterinary antibiotic use included self-reported use, and ownership of syringes and needles for intramuscular or subcutaneous injections. In addition, we observed and inventoried antibiotics on hand in the household. We assumed that the combination of self-reported and direct observation items offers a robust scale with good sensitivity and specificity for veterinary antibiotic use, resulting in less complicated interpretation of *P*-values in regression models <sup>9</sup>.

We used a mixed data factor analysis <sup>10</sup> to explore the properties of scale. The first unrotated component was a weighted average of keeping needles and syringes and using veterinary antibiotics (*abruse\_comp1*, Fig. S3, Table S3) and accounted for 66% of the variance. We interpreted *abr\_use\_comp1* as households that administered livestock antibiotics in the most recent illness. The number of veterinary antibiotics kept at hand dominated the second unrotated component (*abr\_use\_comp2*) and so indicated high levels of antimicrobial usage and accounted for 23% of variation. Component 3 (*ab\_ruse\_comp3*) accounted for 11% of that variation and indicated households that used antibiotics in the most recent livestock illness but didn't keep needles and syringes (as so perhaps were less likely to self-administer).

**Table S3. Ethnic-group comparison of loadings from factor analysis of livestock antimicrobial use composed of the number of veterinary antimicrobials kept at home (continuous), the use of antimicrobials in a recent livestock illness (yes or no) and keeping needles and syringes (yes or no).**

| Variable                           | abruse<br>(component 1 ) | abruse2<br>(component 2) | abruse3<br>(component 3) |
|------------------------------------|--------------------------|--------------------------|--------------------------|
| Number of VAs kept**               | 0.68                     | 0.73                     | 0.08                     |
| Use VAs (No)*                      | -1.26                    | 0.33                     | -0.22                    |
| Use VAs (Yes)*                     | 1.13                     | -0.30                    | 0.20                     |
| Keep needle and syringe<br>(No) *  | -1.14                    | 0.16                     | 0.21                     |
| Keep needle and syringe<br>(Yes) * | 1.37                     | -0.19                    | -0.25                    |

\*self-report; \*\*direct observation

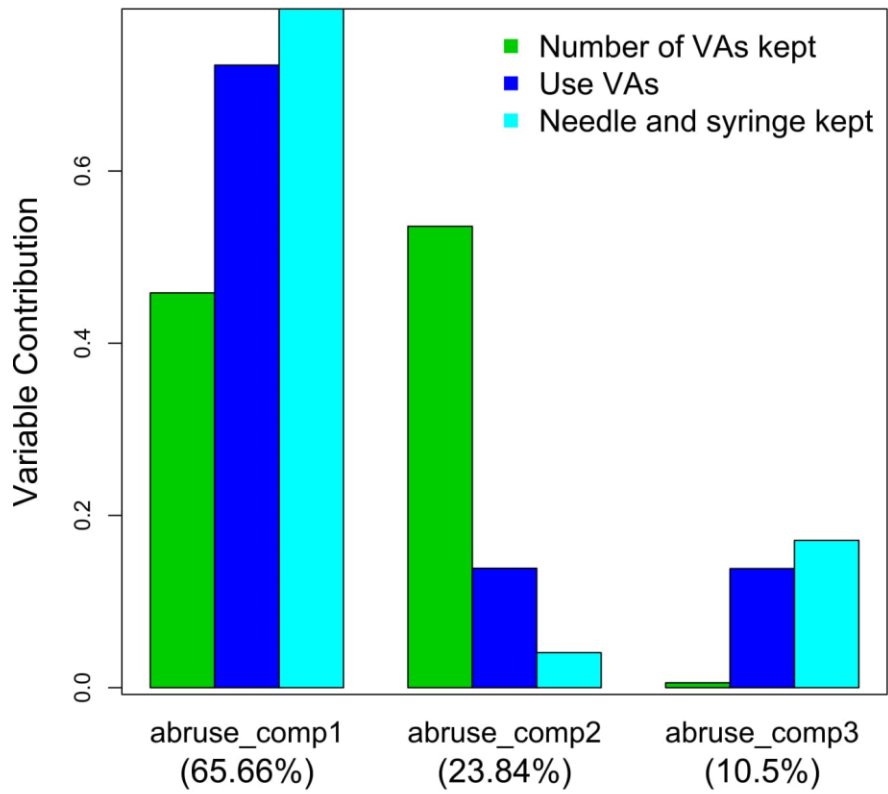

**Figure S3. Mixed data factor analysis of veterinary antimicrobial usage in terms of number of veterinary antimicrobials [VAs] kept at the household, whether VAs were used and whether needles and syringes were kept. The percentage of variance explained by each component is shown in x-axis parentheses.**

3.2 Results of Lasso analyses pooled across groups and for each ethnic group.

Following standard approaches, variables with  $IP_p > 0.6$  (Figs. S4a-S4d)<sup>4</sup> were used in an unpenalised regression to obtain reliable and interpretable regression coefficients (Tables S4a-S4d). For each antimicrobial, we set  $B=500$  and present models including all variables with  $IP_p > 0.6$  (Lasso variables selection) and models with lowest AIC values (Best fit model selected via AIC minimization). The threshold value of 0.6 was chosen within a range of values suggested by Meinshausen<sup>4</sup>. We note the relationship between the expected number of falsely selected variables and the threshold value but our results showed little variability for threshold values greater than 0.6, as expected<sup>4</sup>.

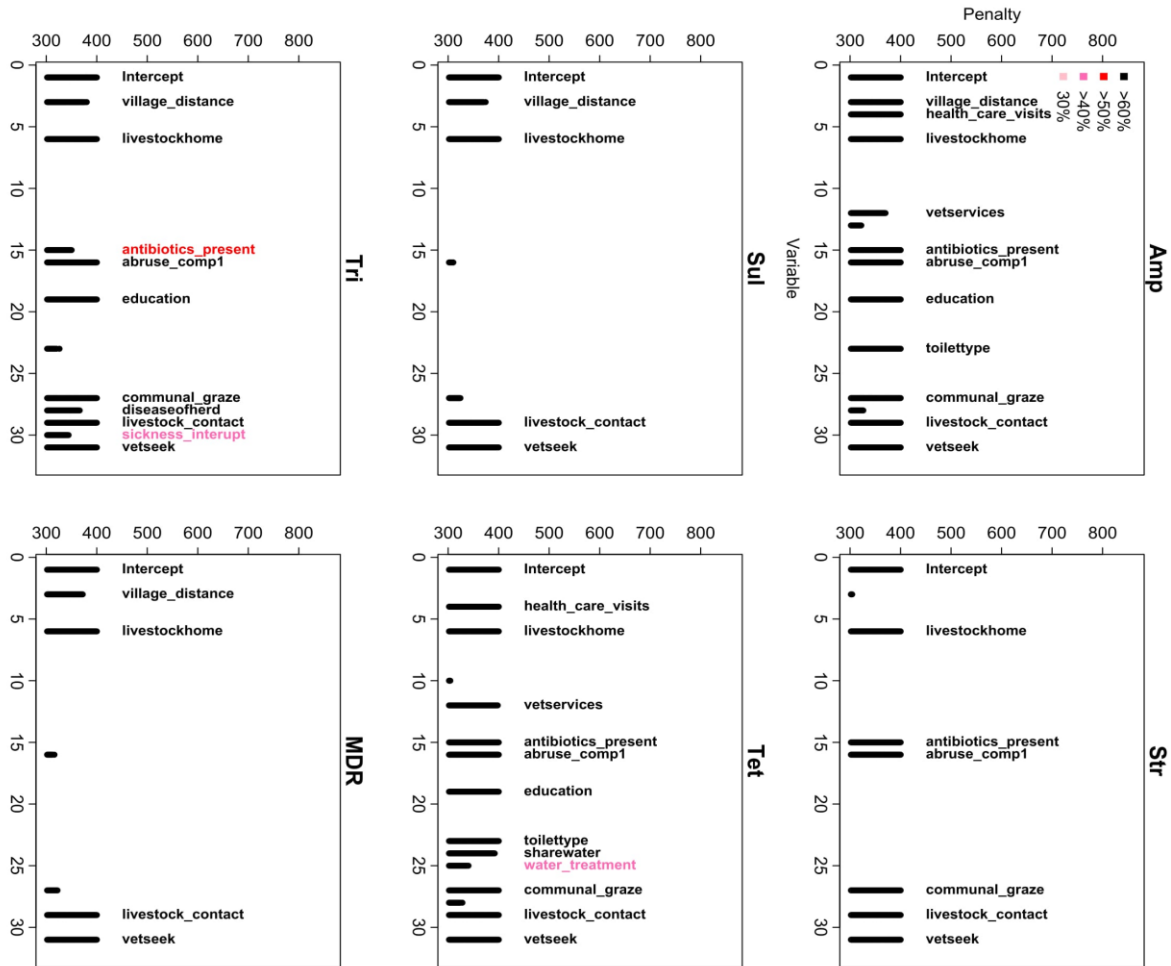

**Figure S4a. Pooled ethnic group (Arusha, Chagga, Maasai) risk factors selected by Lasso models for (Amp)icillin, (Tet)tracycline, (Tri)methoprime, (Sul)famethoxazole, (Str)eptomycin and multidrug resistant (MDR) phenotypes.** Variables selected more than 60% (black), 50% (red), 40% (dark pink) and 30% (light pink) of the time in random Lasso (section S3) from full set of variables (Table S4). The x-axis is the penalty parameter (see Section 3.1 above) and the y-axis is the number scales representing the variables in the model.



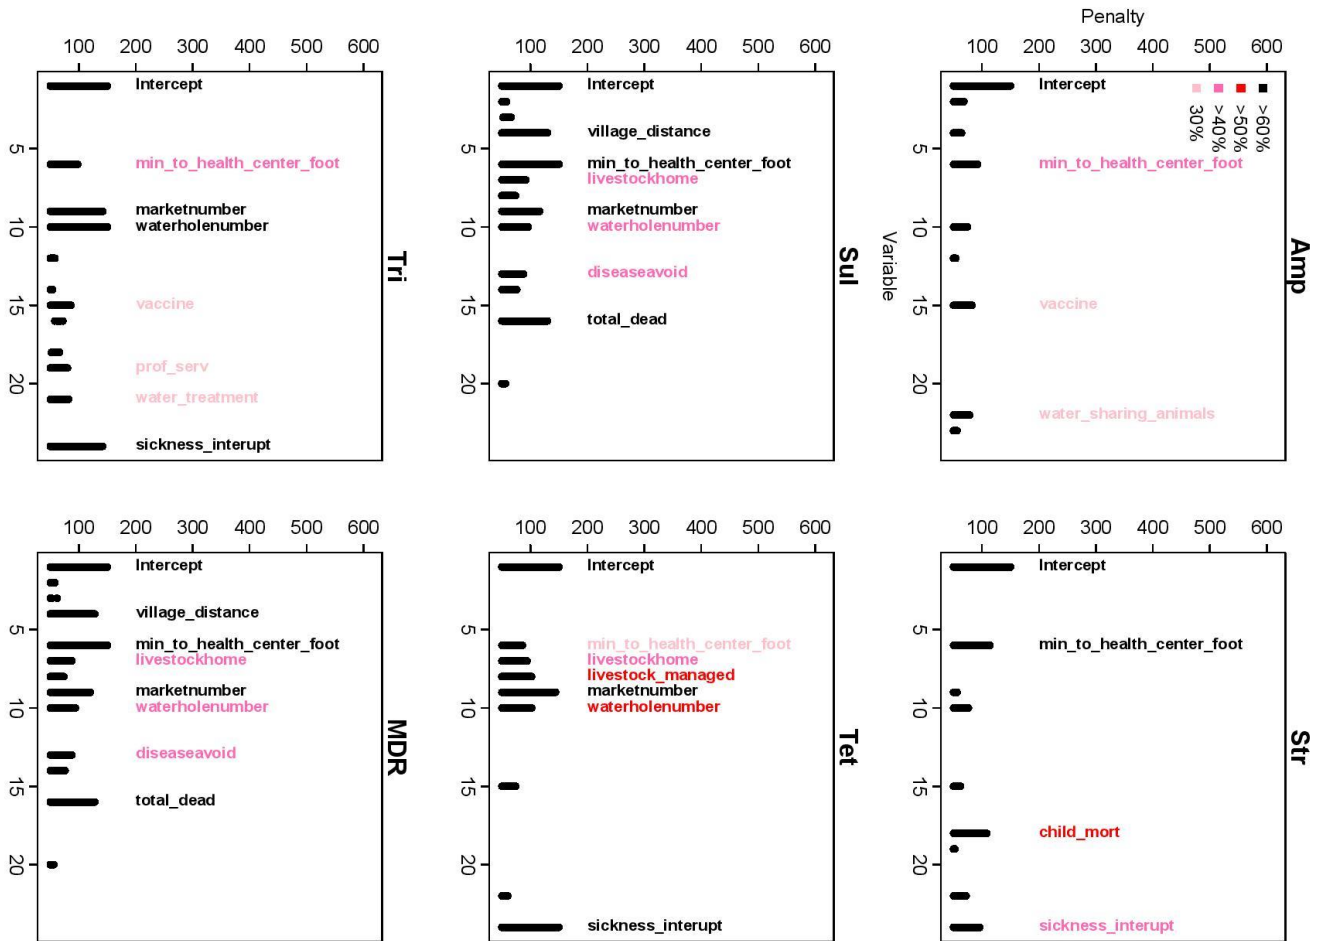

**Figure S4b. Chagga ethnic group risk factors selected by Lasso models for (Amp)icillin, (Tet)tracycline, (Tri)methoprim, (Sul)famethoxazole, (Str)eptomycin and multidrug resistant (MDR) phenotypes.** Variables selected more than 60% (black), 50% (red), 40% (dark pink) and 30% (light pink) of the time in random Lasso (section S3) from full set of variables (Table S2). The x-axis is the penalty parameter (see Section 3.1 above) and the y-axis is the number scales representing the variables in the model.

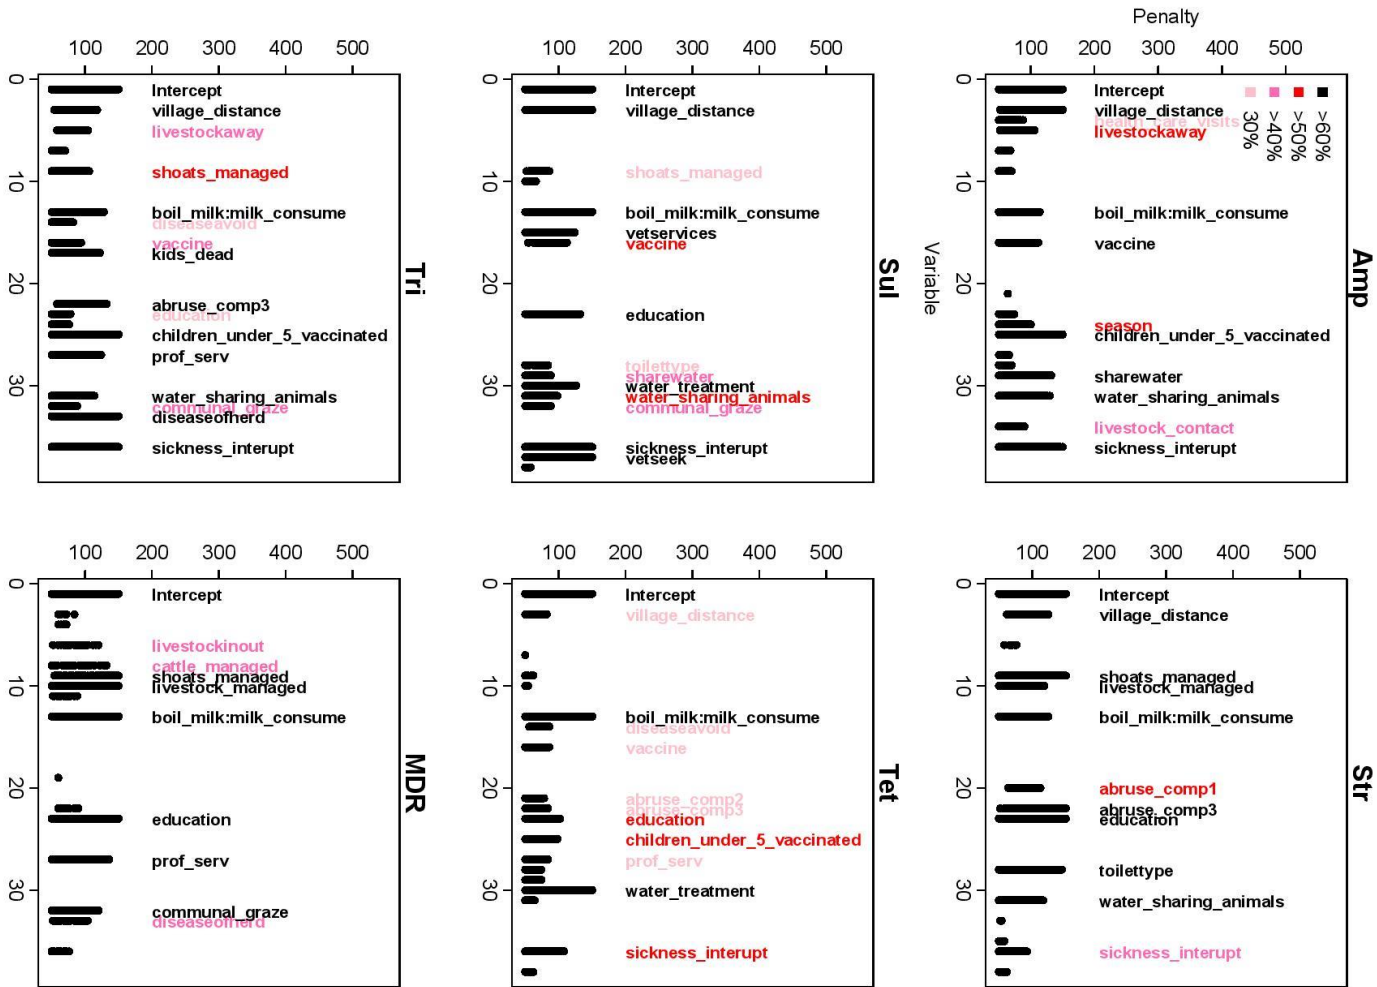

**Figure S4c. Maasai ethnic group risk factors selected by Lasso models for (Amp)icillin, (Tet)tracycline, (Tri)methoprime, (Sul)famethoxazole, (Str)eptomycin and multidrug resistant (MDR) phenotypes.** Variables selected more than 60% (black), 50% (red), 40% (dark pink) and 30% (light pink) of the time in random Lasso (section S3) from full set of variables (Table S2). The x-axis is the penalty parameter (see Section 3.1 above) and the y-axis is the number scales representing the variables in the model.

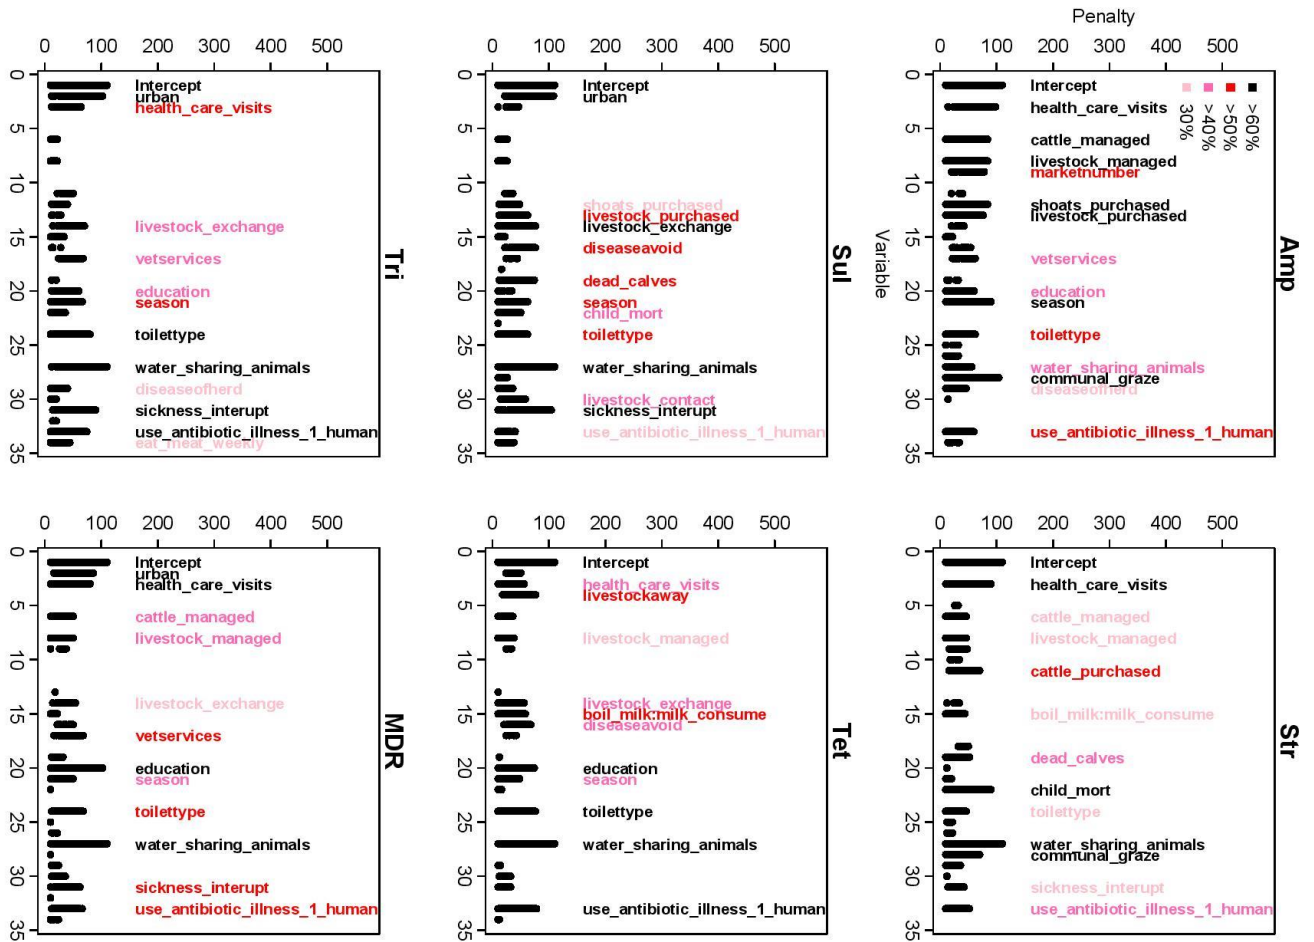

**Figure S4d. Arusha ethnic group risk factors selected by Lasso models for (Amp)icillin, (Tet)racycline, (Tri)methoprim, (Sul)famethoxazole, (Str)eptomycin and multidrug resistant (MDR) phenotypes.** Variables selected more than 60% (black), 50% (red), 40% (dark pink) and 30% (light pink) of the time in random Lasso (section S3) from full set of variables (Table S2). The x-axis is the penalty parameter (see Section 3.1 above) and the y-axis is the a number scales representing the variables in the model.

**Table S4a. Risk factors for antimicrobial-resistant bacteria from Chagga households.** Mixed model results for Chagga households using full set of variables included more than 60% in random Lasso (Fig S3b) clustered at the household level (Lasso variable selection). Models that lower AIC amongst all possible combinations of Lasso selected variables (Best fit model selected via AIC minimization). ‘-’ represents variables not present in model with lowest AIC.

| Antimicrobial           | Variable              | Proportion of time included in final lasso model | Lasso variable selection |         | Best fit model selected via AIC minimization |         |
|-------------------------|-----------------------|--------------------------------------------------|--------------------------|---------|----------------------------------------------|---------|
|                         |                       |                                                  | Estimated odds           | P       | Estimated odds                               | P       |
| <b>Ampicillin</b>       | intercept             | 1                                                | 0.14                     | <0.0001 | -                                            | -       |
| <b>Streptomycin</b>     | intercept             | 1                                                | 0.12                     | <0.0001 | 0.12                                         | <0.0001 |
|                         | mins_to_health_center | 0.647                                            | 0.68                     | 0.1240  | 0.68                                         | 0.1240  |
| <b>Sulfamethoxazole</b> | intercept             | 1                                                | 0.34                     | 0.0002  | 0.35                                         | <0.0001 |
|                         | village_distance      | 0.78                                             | 1.11                     | 0.7163  | -                                            | -       |
|                         | mins_to_health_center | 1                                                | 0.75                     | 0.2750  | 0.65                                         | 0.0619  |
|                         | market_number         | 0.67                                             | 0.99                     | 0.9791  | -                                            | -       |
|                         | total_dead            | 0.80                                             | 0.69                     | 0.2024  | -                                            | -       |
| <b>Tetracycline</b>     | intercept             | 1                                                | 0.37                     | 0.0011  | 0.37                                         | 0.0011  |
|                         | market_number         | 0.941                                            | 0.68                     | 0.0646  | 0.68                                         | 0.0646  |
|                         | sickness_interrupt    | 1                                                | 0.34                     | 0.0086  | 0.34                                         | 0.0086  |
| <b>Trimethoprim</b>     | intercept             | 1                                                | 0.26                     | 0.0003  | 0.19                                         | <0.0001 |

| e                              |                       | 01    |      |             |      |             |
|--------------------------------|-----------------------|-------|------|-------------|------|-------------|
|                                | market_number         | 0.922 | 0.76 | 0.278<br>4  | -    | -           |
|                                | waterhole_number      | 1     | 1.65 | 0.033<br>3  | 1.89 | 0.005<br>3  |
|                                | sickness_interrupt    | 0.922 | 0.57 | 0.255<br>1  | -    | -           |
| <b>Multidrug<br/>Resistant</b> | intercept             | 1     | 0.17 | <0.00<br>01 | 0.17 | <0.00<br>01 |
|                                | village_distance      | 0.784 | 1.07 | 0.829<br>0  | -    | -           |
|                                | mins_to_health_center | 1     | 0.86 | 0.603<br>0  | -    | -           |
|                                | market_number         | 0.796 | 0.78 | 0.423<br>0  | 0.70 | 0.133<br>0  |
|                                | total_dead            | 0.784 | 0.91 | 0.763<br>0  | -    | -           |

---

**Table S4b. Risk factors for antimicrobial-resistant bacteria from Arusha households.** Mixed model results for Arusha households using full set of variables included more than 60% in random Lasso (Fig S3c) clustered at the household level (Lasso variable selection). Models that lower AIC amongst all possible combinations of Lasso selected variables (Best fit model selected via AIC minimization). ‘-’ represents variables not present in model with lowest AIC.

| Antimicrobial           | Variable              | Proportion of time included in final lasso model | Lasso variable selection |          | Best fit model selected via AIC minimization |
|-------------------------|-----------------------|--------------------------------------------------|--------------------------|----------|----------------------------------------------|
|                         |                       |                                                  | Estimated odds           | <i>P</i> | Estimated odds                               |
| <b>Ampicillin</b>       | intercept             | 1                                                | 4.97                     | <0.0001  | 5.00                                         |
|                         | health_care_visits    | 0.90                                             | 1.51                     | 0.1992   | -                                            |
|                         | cattle_managed        | 0.71                                             | NA                       | NA       | -                                            |
|                         | livestock_managed     | 0.71                                             | 1.12                     | 0.7614   | -                                            |
|                         | shoats_purchased      | 0.67                                             | 0.07                     | 0.1146   | 0.05                                         |
|                         | livestock_purchased   | 0.61                                             | 10.73                    | 0.1751   | 16.12                                        |
|                         | season                | 0.80                                             | 0.03                     | 0.0121   | 0.02                                         |
|                         | communal_graze        | 0.92                                             | 0.16                     | 0.0222   | 0.18                                         |
| <b>Streptomycin</b>     | intercept             | 1                                                | 0.10                     | 0.0002   | 0.09                                         |
|                         | health_care_visits    | 0.86                                             | 1.97                     | 0.0394   | 1.98                                         |
|                         | child_mortality       | 0.82                                             | 0.77                     | 0.8373   | -                                            |
|                         | water_sharing_animals | 1                                                | 11.59                    | 0.0094   | 11.70                                        |
|                         | communal_graze        | 0.61                                             | 0.16                     | 0.0438   | 0.16                                         |
| <b>Sulfamethoxazole</b> | intercept             | 1                                                | 0.33                     | 0.0589   | 0.27                                         |
|                         | urban                 | 0.90                                             | 0.70                     | 0.1214   | 0.68                                         |
|                         | livestock_exchange    | 0.69                                             | 0.59                     | 0.0586   | 0.56                                         |
|                         | dead_calves           | 0.61                                             | 1.14                     | 0.5510   | -                                            |

|                            |                                   |      |      |         |      |
|----------------------------|-----------------------------------|------|------|---------|------|
|                            | water_sharing_animals             | 1    | 8.76 | <0.0001 | 9.23 |
|                            | sickness_interrupt                | 0.90 | 0.76 | 0.6040  | -    |
| <b>Tetracycline</b>        | intercept                         | 1    | 0.09 | 0.0334  | 0.07 |
|                            | livestock_away                    | 0.61 | 0.79 | 0.1713  | 0.77 |
|                            | education                         | 0.63 | 0.65 | 0.4159  | -    |
|                            | toilet_type                       | 0.71 | 3.93 | 0.1711  | 4.10 |
|                            | water_sharing_animals             | 1    | 6.18 | 0.0011  | 6.23 |
|                            | use_antimicrobial_illness_1_human | 0.67 | 0.19 | 0.1283  | 0.16 |
| <b>Trimethoprim</b>        | intercept                         | 1    | 0.24 | 0.2496  | 0.57 |
|                            | urban                             | 0.75 | 0.74 | 0.3111  | 0.65 |
|                            | toilet_type                       | 0.71 | 5.35 | 0.1474  | -    |
|                            | water_sharing_animals             | 1    | 2.42 | 0.1462  | 3.47 |
|                            | sickness_interrupt                | 0.82 | 0.54 | 0.2830  | -    |
|                            | use_antimicrobial_illness_1_human | 0.65 | 0.47 | 0.5429  | -    |
| <b>Multidrug Resistant</b> | intercept                         | 1    | 0.32 | 0.0577  | 0.35 |
|                            | urban                             | 0.75 | 0.79 | 0.3915  | -    |
|                            | health_care_visits                | 0.69 | 1.42 | 0.1816  | 1.47 |
|                            | education                         | 0.92 | 0.49 | 0.2364  | 0.9  |
|                            | water_sharing_animals             | 0.98 | 7.25 | 0.0006  | 7.54 |

**Table S4c. Risk factors for antimicrobial-resistant bacteria from Maasai households.** Mixed model results for Maasai households using full set of variables included more than 60% in random Lasso (Fig Sd) clustered at the household level (Lasso variable selection). Models that lower AIC amongst all possible combinations of Lasso selected variables (Best fit model selected via AIC minimization). ‘-’ represents variables not present in model with lowest AIC.

| Antibiotic          | Variable                    | Proportion of time included in final lasso model | LASSO variable selection |          | Best fit model selected via AIC minimization |          |
|---------------------|-----------------------------|--------------------------------------------------|--------------------------|----------|----------------------------------------------|----------|
|                     |                             |                                                  | Estimated odds           | <i>P</i> | Estimated odds                               | <i>P</i> |
| <b>Ampicillin</b>   | Intercept                   | 1                                                | 0.304                    | 0.5191   | 0.304                                        | 0.5192   |
|                     | village_distance            | 0.98                                             | 0.81                     | 0.3856   | -                                            | -        |
|                     | boil_milk                   | 0.65                                             | 4.86                     | 0.0320   | 4.90                                         | 0.0322   |
|                     | boil_milk_consumption       | 0.65                                             | 0.32                     | 0.0342   | 0.31                                         | 0.0268   |
|                     | milk_consume                | 0.65                                             | 2.63                     | 0.0213   | 2.74                                         | 0.0169   |
|                     | children_under_5_vaccinated | 1                                                | 7.83                     | 0.0168   | 7.24                                         | 0.0219   |
|                     | share_water                 | 0.82                                             | 0.17                     | 0.0718   | 0.17                                         | 0.0727   |
|                     | sickness_interrupt          | 0.98                                             | 0.42                     | 0.1758   | 0.37                                         | 0.1170   |
|                     | vaccine                     | 0.63                                             | 0.71                     | 0.1670   | 0.67                                         | 0.0868   |
|                     | water_sharing_animals       | 0.78                                             | 7.21                     | 0.1181   | 6.30                                         | 0.1470   |
| <b>Tetracycline</b> | intercept                   | 1                                                | 0.49                     | 0.1460   | 0.45                                         | 0.0911   |
|                     | boil_milk                   | 1                                                | 13.90                    | 0.0003   | 14.88                                        | 0.0002   |
|                     | boil_milk_consumption       | 1                                                | 0.18                     | 0.0009   | 0.16                                         | 0.0004   |
|                     | milk_consume                | 1                                                | 3.00                     | 0.0079   | 3.10                                         | 0.0058   |



|                         |                             |      |       |        |       |         |
|-------------------------|-----------------------------|------|-------|--------|-------|---------|
|                         | water_treatment             | 1    | 0.59  | 0.4594 | -     | -       |
| <b>Trimethoprim</b>     | intercept                   | 1    | 0.13  | 0.0781 | 0.13  | 0.0969  |
|                         | village_distance            | 0.67 | 0.96  | 0.8561 | -     | -       |
|                         | boil_milk                   | 0.78 | 10.16 | 0.0022 | 10.70 | 0.0018  |
|                         | boil_milk_consumption       | 0.78 | 0.25  | 0.0167 | 0.21  | 0.0044  |
|                         | milk_consume                | 0.78 | 2.44  | 0.0613 | 2.89  | 0.0157  |
|                         | children_under_5_vaccinated | 1    | 5.60  | 0.0645 | 5.53  | 0.0632  |
|                         | disease_of_herd             | 1    | 2.23  | 0.1031 | 2.19  | 0.1126  |
|                         | kids_dead                   | 0.73 | 1.26  | 0.4122 | -     | -       |
|                         | sickness_interrupt          | 1    | 0.31  | 0.0876 | 0.31  | 0.0755  |
| <b>Sulfamethoxazole</b> | intercept                   | 1    | 1.09  | 0.9142 | 0.41  | 0.2248  |
|                         | village_distance            | 1    | 0.66  | 0.1110 | 0.61  | 0.0597  |
|                         | boil_milk                   | 1    | 31.83 | 0.0001 | 32.46 | <0.0001 |
|                         | boil_milk_consumption       | 1    | 0.12  | 0.0008 | 0.12  | 0.0002  |
|                         | milk_consume                | 1    | 4.09  | 0.0038 | 3.97  | 0.0023  |
|                         | education                   | 0.82 | 0.39  | 0.0634 | 2.08  | 0.1348  |
|                         | sickness_interrupt          | 1    | 0.20  | 0.0166 | 0.21  | 0.0198  |
|                         | vet_services                | 0.71 | 0.55  | 0.0136 | 0.56  | 0.0147  |
|                         | water_treatment             | 0.75 | 0.37  | 0.2238 | -     | -       |
| <b>Streptomycin</b>     | intercept                   | 1    | 0.83  | 0.8885 | 0.17  | 0.0003  |

|                                |                       |      |       |        |       |        |
|--------------------------------|-----------------------|------|-------|--------|-------|--------|
|                                | village_distance      | 0.63 | 0.87  | 0.5497 | -     | -      |
|                                | boil_milk             | 0.75 | 7.76  | 0.0067 | 8.76  | 0.0043 |
|                                | boil_milk_consumption | 0.75 | 0.27  | 0.0148 | 0.23  | 0.0073 |
|                                | milk_consume          | 0.75 | 2.98  | 0.0147 | 3.39  | 0.0056 |
|                                | abruse3               | 0.94 | 0.68  | 0.2379 | -     | -      |
|                                | shoats_managed        | 1    | 2.04  | 0.0460 | 2.09  | 0.0570 |
|                                | toilet_type           | 0.94 | 2.18  | 0.2782 | 3.13  | 0.1039 |
|                                | water_sharing_animals | 0.67 | 0.24  | 0.2477 | -     | -      |
| <b>Multidrug<br/>Resistant</b> | intercept             | 1    | 0.47  | 0.5842 | 0.25  | 0.0038 |
|                                | boil_milk             | 1    | 16.53 | 0.0001 | 15.49 | 0.0001 |
|                                | boil_milk_consumption | 1    | 0.19  | 0.0029 | 0.21  | 0.0021 |
|                                | milk_consume          | 1    | 3.18  | 0.0112 | 2.92  | 0.0089 |
|                                | education             | 1    | 1.75  | 0.2118 | 1.97  | 0.1129 |
|                                | shoats_managed        | 0.76 | 3.53  | 0.2148 | 1.53  | 0.1101 |
|                                | livestock_managed     | 0.9  | 0.40  | 0.3947 | -     | -      |
|                                | prof_serv             | 0.76 | 0.99  | 0.9921 | -     | -      |
|                                | communal_graze        | 0.71 | 0.52  | 0.6400 | -     | -      |

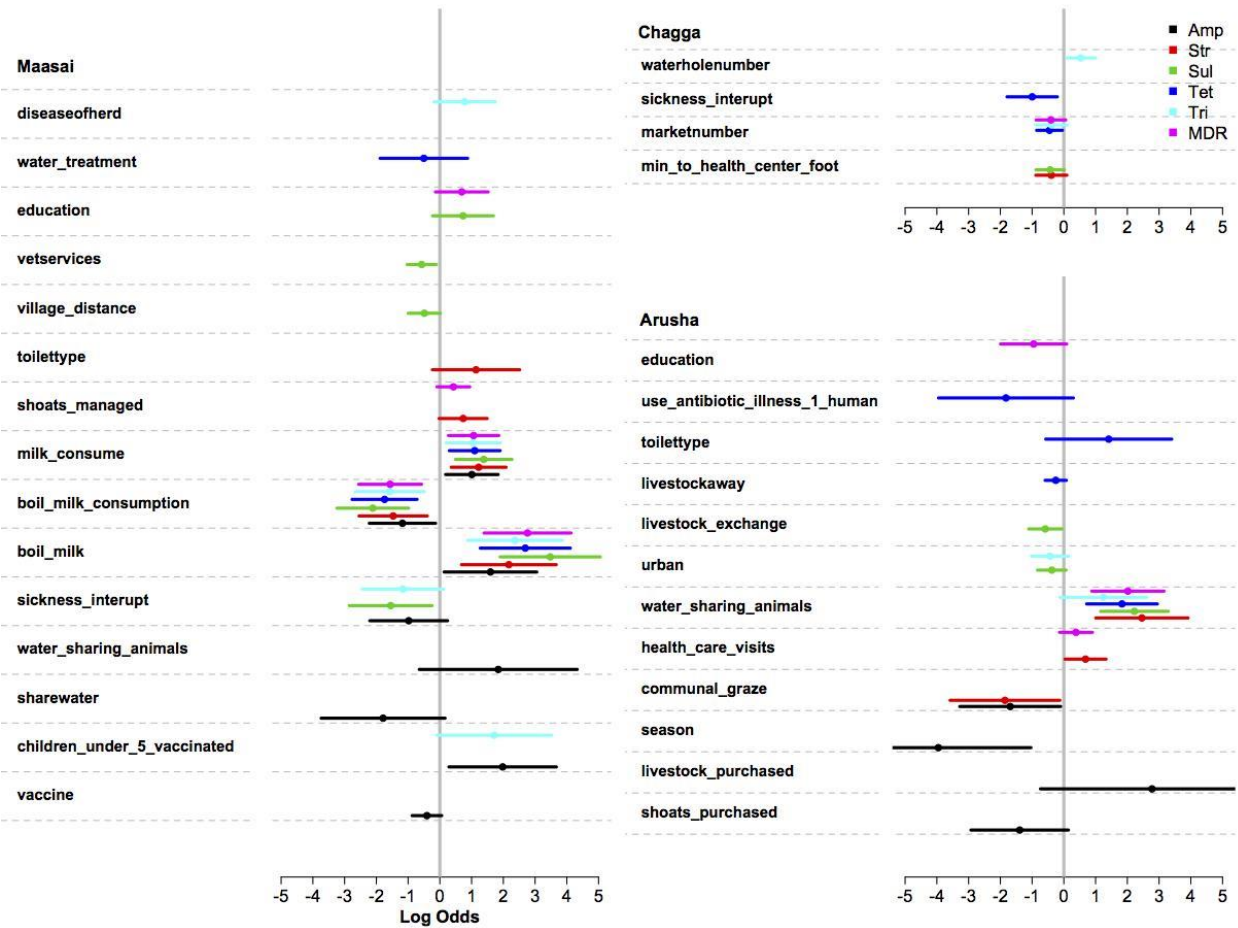

**Figure S5. Risk factors for antimicrobial resistant *E. coli* isolated from stool samples of pooled across Maasai, Arusha, and Chagga people.** Estimated log odds shown as points and 95% confidence interval shown in bars. Colors indicate (Amp)icillin, (Str)eptomycin, (Sul)famethoxazole, (Tet)tracycline, (Tri)methoprime, or MDR (multidrug resistant phenotype). See Table 2 for variable descriptions.

#### 4. Analysis of bacterial load in milk and swabs of milking containers

There were no significant differences in the bacterial load (colony forming units per ml; cfu/ml) across ethnic groups ( $F_{(1,165)} = 2.9, P = 0.09$ ; Fig. 3B). Significant ( $F_{(3,106)} = 6.06, P = 0.0008$ ) differences were noted for different containers. A Tukey post-hoc test indicated these differences were driven by the carriage of lower (1.45  $\text{Log}_{10}$  cfu/ml) loads in milk samples collected directly from an udder compared to samples collected from a calabash (3.13  $\text{Log}_{10}$  cfu/ml), metal (3.60  $\text{Log}_{10}$  cfu/ml), and or plastic containers (3.86  $\text{Log}_{10}$  cfu/ml).

##### 4.1 Analyses of the prevalence of antimicrobial resistant lactose-fermenting Gram-negative bacteria in milk and swab samples

A total of 8,106 lactose-fermenting bacteria from milk (n = 5,131) and swabs (n = 2,975) were characterized for their antimicrobial resistance patterns. Overall, these isolates expressed similar resistance patterns as fecal resistant bacteria *E. coli* (Fig. 1, main manuscript) with the highest resistance for Amp, Tri, Sul, Tet and Str (Fig. 3A, main manuscript). Interestingly, Maasai milk and swab isolates harbored a higher prevalence of

ciprofloxacin resistance (31.41% and 11.20%, respectively) compared to fecal isolates (Fig. 1, main manuscript) and Arusha milk isolates. Results from single-factor multivariate analysis of variance (MANOVA) shows that the Maasai milk harbored significantly higher levels of Sul ( $P = 0.003$ ), Tet ( $P = 0.03$ ) and Tri ( $P = 0.0007$ ) resistant bacteria compared to the Arusha households (Fig. 3B). Except for Cip resistance, swab isolates from Maasai households (Fig. S5) and fecal isolates from Arusha and Maasai households (Fig. 1, main manuscript) showed similar resistance patterns. In addition, regression models comparing the average proportions of each antimicrobial-resistant lactose-fermenting bacteria also showed a positive correlation between milk and fecal patterns (Fig. S7).

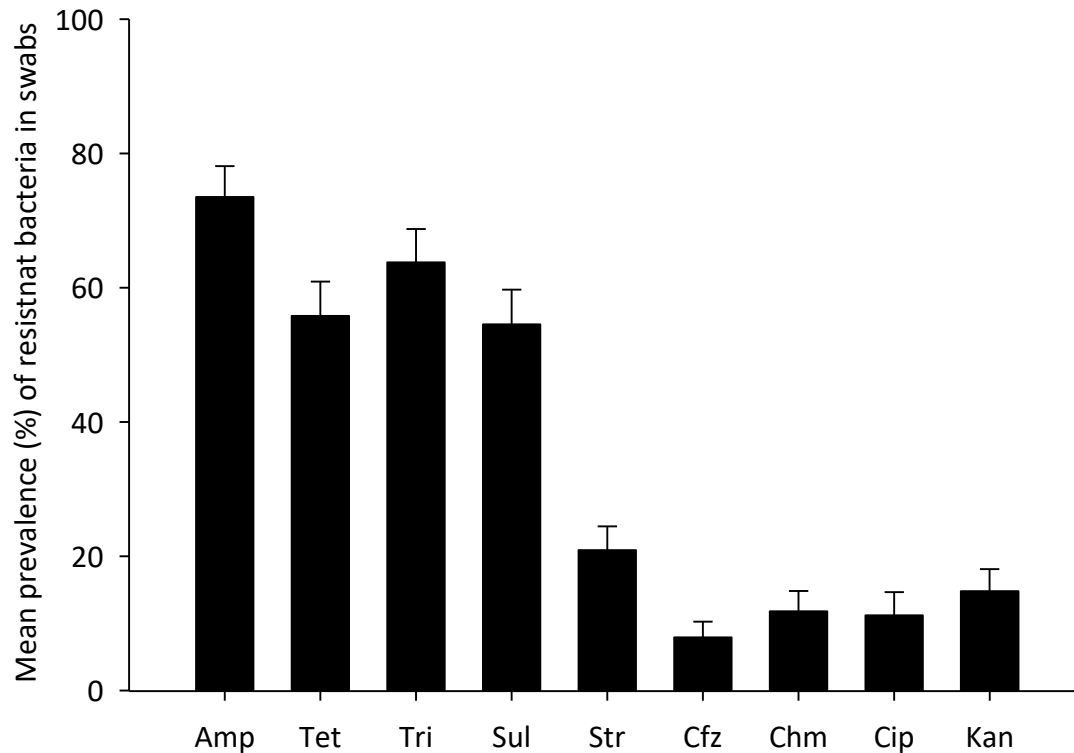

**Figure S6. Mean prevalence of antimicrobial-resistant, Gram-negative lactose-fermenting bacteria (N=46) isolated from swabs of dry milk containers. Error bars are standard errors.** The antimicrobial-resistance patterns of bacteria isolated from Maasai milk-containers are similar (except for Cip resistance) to bacteria isolated from Maasai milk samples. Milk containers were dry at the time of sampling. Antimicrobials include (Amp)picillin, (Tet)tracycline, (Tri)methoprine, (Sul)famethoxazole, (Str)eptomycin, Ceftazidime (Cfz), Chloramphenicol (Chm), (Cip)rofloxacine and (Kan)amycin. Error bars represent standard error.

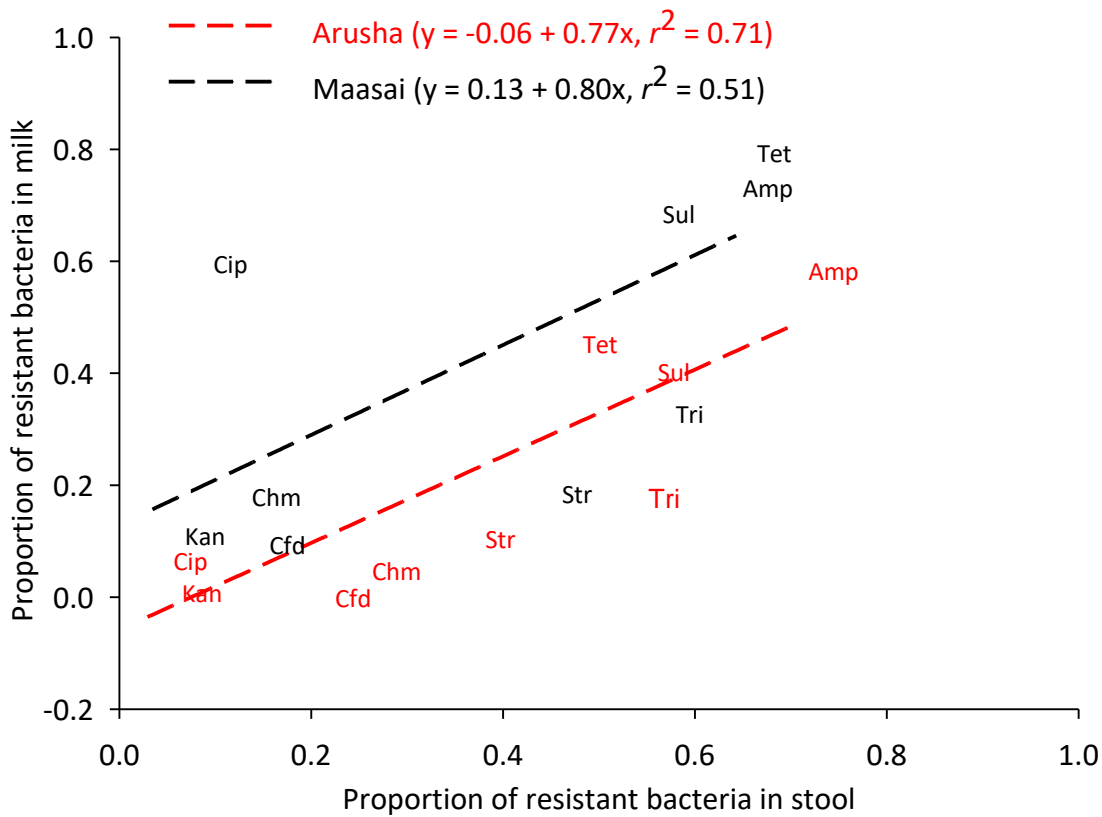

**Figure S7. The proportion of Gram-negative lactose-fermenting bacteria resistant to nine antimicrobials for stool (x-axis) and milk samples (y-axis) collected from Maasai (in black; stool, n = 80; milk, n = 63) and Arusha (in red; stool, n = 55; milk, n = 31) households.** These data are not paired at the household level and the samples were collected on different dates. For paired samples see Fig. 4a, in main manuscript.

#### 4.2 Oxytetracycline residues remained biologically active after boiling milk.

We examined the biological activity of oxytetracycline after milk is boiled by using a competitive growth study between antibiotic-resistant and an isogenic susceptible *E. coli* populations. Our findings showed that the resistant *E. coli* population had an advantage over susceptible population in the presence of oxytetracycline, and that boiling milk had no significant effect on oxytetracycline ( $P = 0.64$ , Fig. S8).

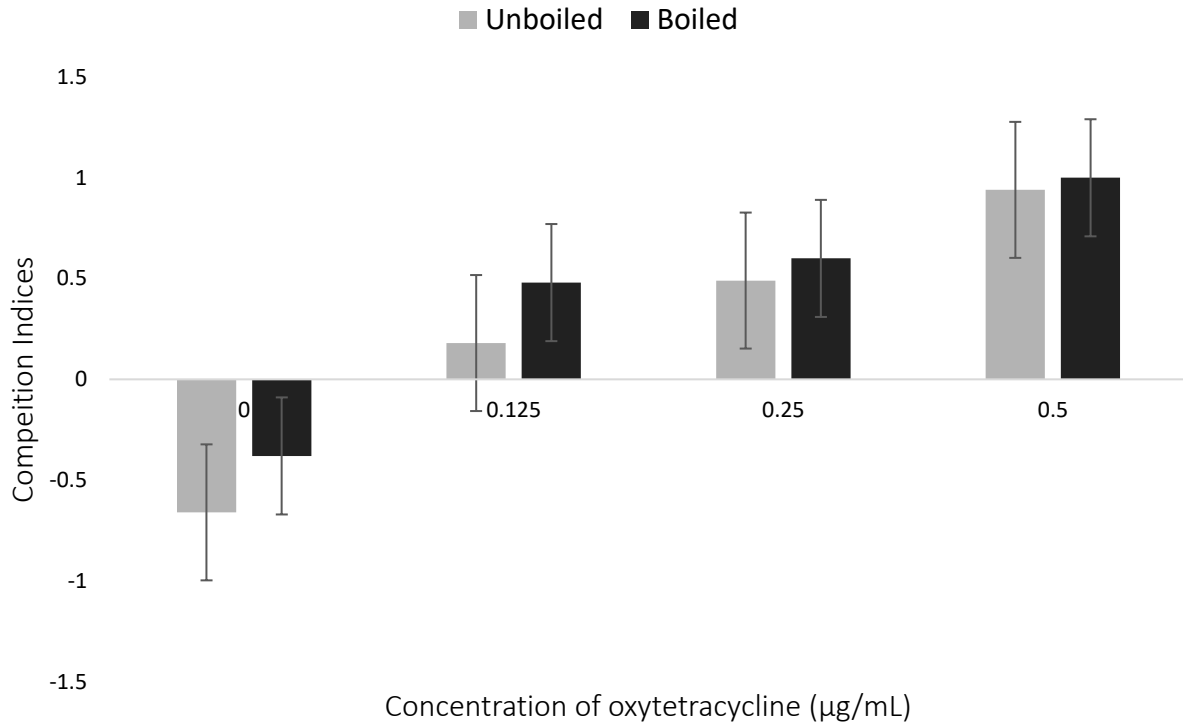

**Figure S8. The mean competition index obtained from co-culture of a wild-type strain of *E. coli* (SSuT-6; (25)) and an isogenic strain (lacking streptomycin, sulfadiazine and tetracycline resistance genes) in milk (n = 4 independent replicates).** Strong selection for the resistant population (values > 0) was evident in the presence of oxytetracycline in unboiled milk and after boiling milk samples that contained oxytetracycline. A two-factor ANOVA confirmed no differences between boiled and unboiled treatments ( $P = 0.64$ ) while concentration was significant ( $P < 0.001$ ; interactions  $P = 0.99$ ). Error bars represent standard errors.

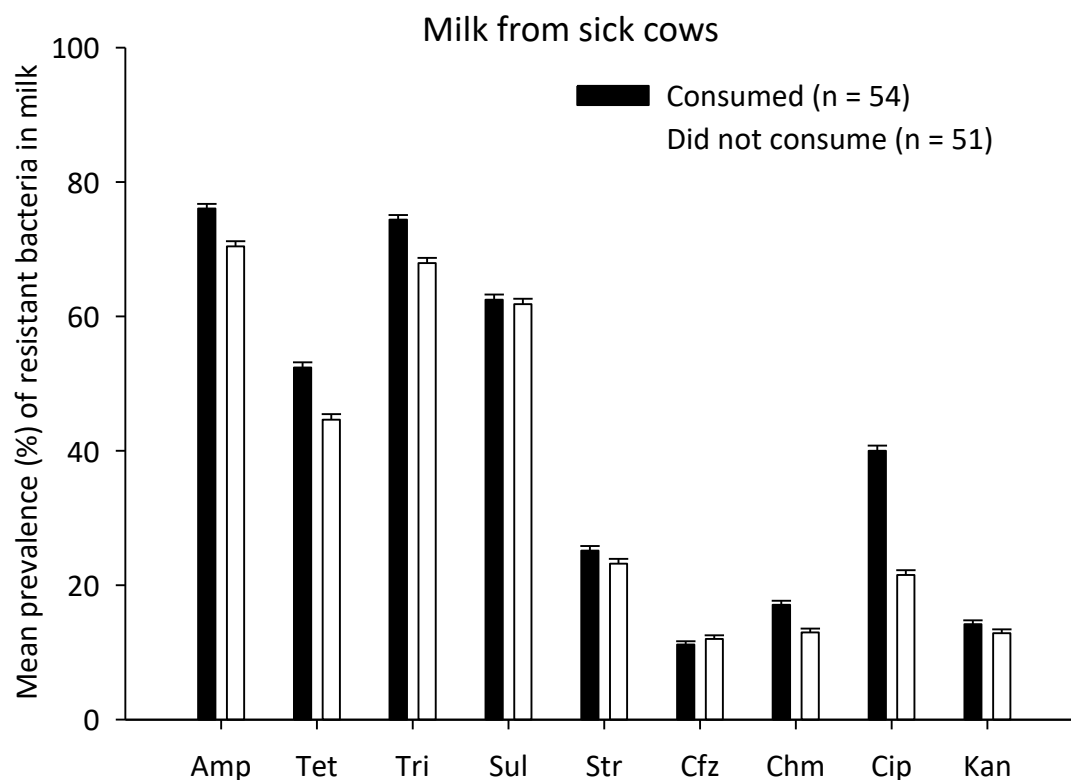

**Figure S9. Mean prevalence of antimicrobial-resistant, Gram-negative lactose-fermenting bacteria (N = 6,458) isolated from milk samples (N=179) at Maasai and Arusha households. Results are summarized for households that consumed (filled bars) or that did not consume (open bars) milk from sick cows.** Households that consume milk from sick cows had a significantly higher prevalence of antimicrobial-resistant bacteria (MANOVA,  $P < 0.01$ ) for all antimicrobials tested except for Cfz, Kan and Sul. Antimicrobials include (Amp)icillin, (Tet)tracycline, (Tri)methoprine, (Sul)famethoxazole, (Str)eptomycin, Ceftazidime (Cfz), (Chl)oramphenicol, (Cip)rofloxacin and (Kan)amycin. Error bars represent standard error.

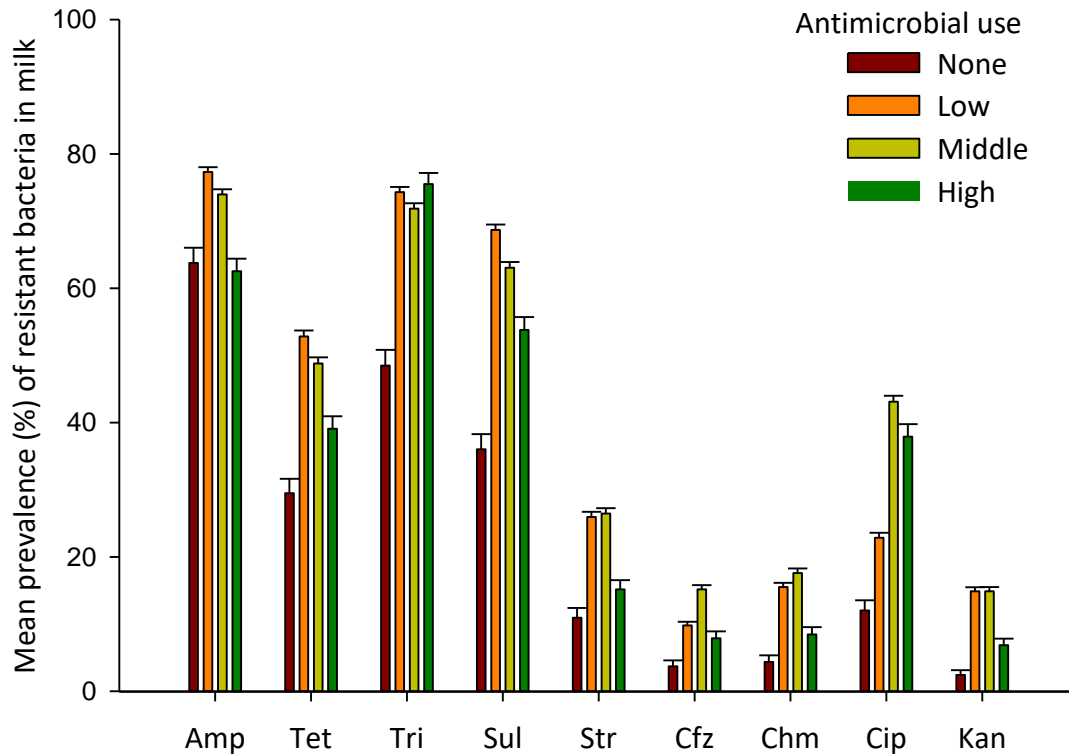

**Figure S10. Mean prevalence of antimicrobial-resistant, Gram-negative lactose-fermenting bacteria (N = 7,505) isolated from milk samples (N=182) across Maasai and Arusha households with None (N = 21), Low (N = 27), Middle (N = 34) and High (N = 24) “levels” of reported veterinary antimicrobial use.** Low, middle and high categories designate households that kept 1-2, 3-4, or 5-6 antimicrobials on hand. Except None, all households had syringes to administer antimicrobials to livestock. Antimicrobials include (Amp)icillin, (Tet)tracycline, (Tri)methoprim, (Sul)famethoxazole, (Str)eptomycin, Cefazidime (Cfz), Chloramphenicol (Chm), (Cip)rofloxacin and (Kan)amycin. Significant differences between groups are discussed in the “Results” section. Error bars represent standard error.



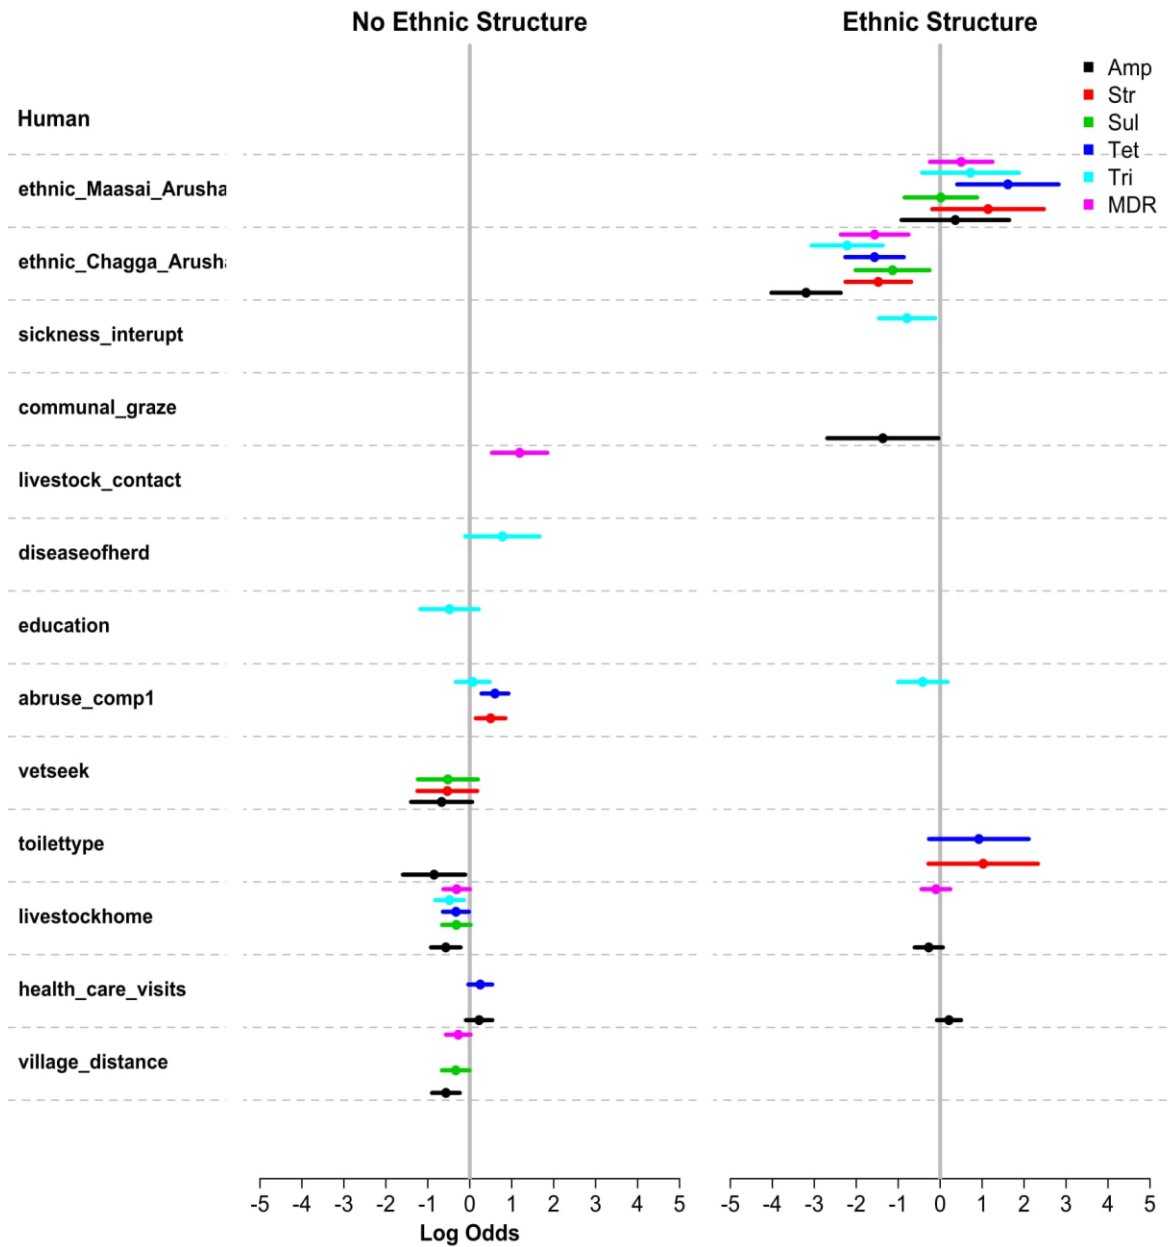

**Figure S11. Risk factors for antimicrobial resistant for *E. coli* isolated from people across all ethnic groups (Arusha, Chagga, Maasai).** This figure compares models controlling for ethnic group to a model that does not control for ethnic group. Estimated log odds shown as points and 95% confidence interval shown in bars. Colors indicate (Amp)icillin, (Str)eptomycin, (Sul)famethoxazole, (Tet)tracycline, (Tri)methoprine, or MDR (multidrug resistant phenotype).

**Table S12. Comparison of average household prevalence of antimicrobial-resistant *E. coli* from fecal samples from Maasai, Chagga and Arusha households. Tabulated *P*-values are from MANOVA analyses.**

| Ethnic groups    | Amp     | Cfz     | Chl     | Cip    | Kan  | Str     | Sul     | Tet     | Tri     |
|------------------|---------|---------|---------|--------|------|---------|---------|---------|---------|
| Maasai vs Chagga | <0.0001 | 0.0005  | 0.004   | 0.0006 | 0.02 | <0.0001 | <0.0001 | <0.0001 | <0.0001 |
| Arusha vs Chagga | <0.0001 | <0.0001 | <0.0001 | 0.06   | 0.01 | 0.0002  | <0.0001 | <0.0001 | <0.0001 |
| Maasai vs Arusha | 0.12    | 0.008   | 0.001   | 0.13   | 1    | 0.3     | 0.3     | 0.003   | 0.6     |

**Table S13. Comparison of average household prevalence of antibiotic-resistant lactose-fermenting bacteria isolates (N=8,106) from milk samples from Maasai and Arusha households.** Tabulated *P*-values are from MANOVA analyses

| Ethnic groups    | Amp    | Cfz    | Chl    | Cip    | Kan    | Str    | Sul    | Tet    | Tri    |
|------------------|--------|--------|--------|--------|--------|--------|--------|--------|--------|
| Maasai vs Arusha | 0.0582 | 0.0471 | 0.0371 | 0.0001 | 0.0205 | 0.0352 | 0.0028 | 0.0352 | 0.0028 |

## References

- 1 Caudell MA, Quinlan MB, Subbiah M, *et al.* Antimicrobial Use and Veterinary Care among Agro-Pastoralists in Northern Tanzania. *PloS One* 2017; **12**: e0170328.
- 2 Bej AK, McCarty SC, Atlas R. Detection of coliform bacteria and *Escherichia coli* by multiplex polymerase chain reaction: comparison with defined substrate and plating methods for water quality monitoring. *Appl Environ Microbiol* 1991; **57**: 2429–32.
- 3 Park H, Imoto S, Miyano S. Recursive Random Lasso (RRLasso) for Identifying Anti-Cancer Drug Targets. *PloS One* 2015; **10**: e0141869.
- 4 Meinshausen N, Bühlmann P. Stability selection. *J R Stat Soc Ser B Stat Methodol* 2010; **72**: 417–73.
- 5 Wang S, Nan B, Rosset S, Zhu J. Random lasso. *Ann Appl Stat* 2011; **5**: 468.
- 6 Huang S, Marchetti-Bowick M. Summary and discussion of `Stability Selection. .
- 7 Sabourin JA, Valdar W, Nobel AB. A permutation approach for selecting the penalty parameter in penalized model selection. *Biometrics* 2015; **71**: 1185–94.
- 8 Groll A, Tutz G. Variable selection for generalized linear mixed models by L1-penalized estimation. *Stat Comput* 2014; **24**: 137–54.
- 9 Colquhoun D. An investigation of the false discovery rate and the misinterpretation of p-values. *R Soc Open Sci* 2014; **1**. DOI:10.1098/rsos.140216.
- 10 Lê S, Josse J, Husson F. FactoMineR: an R package for multivariate analysis. *J Stat Softw* 2008; **25**: 1–18.
- 11 Eberhart LJ, Deringer JR, Brayton KA, Sawant AA, Besser TE, Call DR. Characterization of a novel microcin that kills enterohemorrhagic *Escherichia coli* O157: H7 and O26. *Appl Environ Microbiol* 2012; **78**: 6592–9.

1. Village \*

- Mt. Meru
- Nodonjukin
- Loro
- Meliot

2. Enumerator \*

- Godfrey
- Isaya
- Lemuta
- William

Participant ID Number \*

3. Survey Year \*

- 2016
- 2015
- 2014
- 2013

Survey Month \*

January  
February  
March  
April  
May  
June  
July  
August  
September  
October  
November  
December

Survey Day \*

1  
2  
3  
4  
5  
6  
7  
8  
9  
10  
11  
12  
13  
14  
15  
16  
17  
18  
19  
20  
21  
22  
23  
24  
25  
26  
27  
28  
29  
30  
31

**Basic Demographics**

---

4. Gender \*

- Male
- Female

5. What is your relationship to the head of the household? \*

- Head of household
- Spouse of head of household
- Son of head of household
- In-law
- Hired labor
- Daughter of head of household
- Other

6. Ethnic Group \*

- Chagga
- Maasai
- Warusha
- Other

7. How old are you? \*

Enter a number.



8. What is your religion? \*

- Protestant Christian
- Catholic Christian
- Muslim
- Traditional
- None
- Other

9. Do you read? \*

- Yes
- No

10. Highest level of education \*

- No formal education
- Some primary school
- Completed primary school
- Some high school
- Completed high school
- Some education beyond high school
- Finished college
- Postgraduate or above

11. Are you married? \*

- Yes
- Never
- Divorced
- Widow(er)

12. How many times have you been married? \*

- Never
- 1
- 2
- 3
- 4
- 5
- 6
- 7
- 8
- 9
- 10+

13. If married, how old were you when you got married the first time? \*

Enter a number.

- 10
- 11
- 12
- 13
- 14
- 15
- 16
- 17
- 18
- 19
- 20
- 21
- 22
- 23
- 24
- 25
- 26
- 27
- 28
- 29
- 30
- 31
- 32
- 33
- 34
- 35
- 36
- 37
- 38
- 39
- 40
- 41
- 42
- 43
- 44
- 45
- 46
- 47
- 48
- 49
- 50
- NEVER MARRIED

14. How many wives do you or your husband have currently? \*

- 0
- 1
- 2
- 3
- 4
- 5
- 6
- 7
- 8
- 9
- 10+

15. What is your birth order? \*

- First
- Middle
- Last

16. How many siblings do you have? \*

|                   | 0                     | 1                     | 2                     | 3                     | 4                     | 5                     | 6                     | 7                     | 8                     | 9                     | 10+                   |
|-------------------|-----------------------|-----------------------|-----------------------|-----------------------|-----------------------|-----------------------|-----------------------|-----------------------|-----------------------|-----------------------|-----------------------|
| Brothers living   | <input type="radio"/> | <input type="radio"/> | <input type="radio"/> | <input type="radio"/> | <input type="radio"/> | <input type="radio"/> | <input type="radio"/> | <input type="radio"/> | <input type="radio"/> | <input type="radio"/> | <input type="radio"/> |
| Brothers deceased | <input type="radio"/> | <input type="radio"/> | <input type="radio"/> | <input type="radio"/> | <input type="radio"/> | <input type="radio"/> | <input type="radio"/> | <input type="radio"/> | <input type="radio"/> | <input type="radio"/> | <input type="radio"/> |
| Sisters living    | <input type="radio"/> | <input type="radio"/> | <input type="radio"/> | <input type="radio"/> | <input type="radio"/> | <input type="radio"/> | <input type="radio"/> | <input type="radio"/> | <input type="radio"/> | <input type="radio"/> | <input type="radio"/> |
| Sisters deceased  | <input type="radio"/> | <input type="radio"/> | <input type="radio"/> | <input type="radio"/> | <input type="radio"/> | <input type="radio"/> | <input type="radio"/> | <input type="radio"/> | <input type="radio"/> | <input type="radio"/> | <input type="radio"/> |

## Children

---

17. How old were you when your first child was born? \*

- No Children
- 10
- 11
- 12
- 13
- 14
- 15
- 16
- 17
- 18
- 19
- 20
- 21
- 22
- 23
- 24
- 25
- 26
- 27
- 28
- 29
- 30
- 31
- 32
- 33
- 34
- 35
- 36
- 37
- 38
- 39
- 40
- 41
- 42
- 43
- 44
- 45
- 46
- 47
- 48
- 49
- 50

18. How many children do you have? \*

|                      | 0                     | 1                     | 2                     | 3                     | 4                     | 5                     | 6                     | 7                     | 8                     | 9                     | 10                    | 11                    | 12                    | 13                    | 14                    | 15                    | 16+                   |
|----------------------|-----------------------|-----------------------|-----------------------|-----------------------|-----------------------|-----------------------|-----------------------|-----------------------|-----------------------|-----------------------|-----------------------|-----------------------|-----------------------|-----------------------|-----------------------|-----------------------|-----------------------|
| Sons living *        | <input type="radio"/> | <input type="radio"/> | <input type="radio"/> | <input type="radio"/> | <input type="radio"/> | <input type="radio"/> | <input type="radio"/> | <input type="radio"/> | <input type="radio"/> | <input type="radio"/> | <input type="radio"/> | <input type="radio"/> | <input type="radio"/> | <input type="radio"/> | <input type="radio"/> | <input type="radio"/> | <input type="radio"/> |
| Sons deceased *      | <input type="radio"/> | <input type="radio"/> | <input type="radio"/> | <input type="radio"/> | <input type="radio"/> | <input type="radio"/> | <input type="radio"/> | <input type="radio"/> | <input type="radio"/> | <input type="radio"/> | <input type="radio"/> | <input type="radio"/> | <input type="radio"/> | <input type="radio"/> | <input type="radio"/> | <input type="radio"/> | <input type="radio"/> |
| Daughters living *   | <input type="radio"/> | <input type="radio"/> | <input type="radio"/> | <input type="radio"/> | <input type="radio"/> | <input type="radio"/> | <input type="radio"/> | <input type="radio"/> | <input type="radio"/> | <input type="radio"/> | <input type="radio"/> | <input type="radio"/> | <input type="radio"/> | <input type="radio"/> | <input type="radio"/> | <input type="radio"/> | <input type="radio"/> |
| Daughters deceased * | <input type="radio"/> | <input type="radio"/> | <input type="radio"/> | <input type="radio"/> | <input type="radio"/> | <input type="radio"/> | <input type="radio"/> | <input type="radio"/> | <input type="radio"/> | <input type="radio"/> | <input type="radio"/> | <input type="radio"/> | <input type="radio"/> | <input type="radio"/> | <input type="radio"/> | <input type="radio"/> | <input type="radio"/> |

19. Did you have any children that didn't survive to one year old? \*

- Yes
- No

20. Number of persons in household

Enter numbers for all that apply.

If none apply, enter 0 in at least one box.

|                                | Number                      | Number in School                      |
|--------------------------------|-----------------------------|---------------------------------------|
| Children less than school age  | Number <input type="text"/> | Number in School <input type="text"/> |
| Females : Primary school age   | Number <input type="text"/> | Number in School <input type="text"/> |
| Females : Secondary school age | Number <input type="text"/> | Number in School <input type="text"/> |
| Females : Between 19-65        | Number <input type="text"/> | Number in School <input type="text"/> |
| Females : Over 65              | Number <input type="text"/> | Number in School <input type="text"/> |
| Males : Primary school age     | Number <input type="text"/> | Number in School <input type="text"/> |
| Males : Secondary school age   | Number <input type="text"/> | Number in School <input type="text"/> |
| Males : Between 19-65          | Number <input type="text"/> | Number in School <input type="text"/> |
| Males : Over 65                | Number <input type="text"/> | Number in School <input type="text"/> |

**Health/Health Services**

---

21. What health services do you use for yourself and family? **CHECK ALL THAT APPLY \***

- Government clinic
- Private doctor
- Government hospital
- Private hospital
- Local/indigenous practitioners
- Dispensary
- None
- Other (please specify)

22. If you can't treat yourself, where do you go FIRST for medical treatment? \*

- Government clinic
- Private doctor
- Government hospital
- Private hospital
- Local/indigenous practitioners
- Dispensary
- None
- Other (please specify)

23. If you go to [repeat what they answered above], and they can't help you, then where do you go next for medical treatment? \*

This CANNOT be the SAME SELECTION AS 22!

- Government clinic
- Private doctor
- Govt hospital
- Private hospital
- Local/indigenous practitioners
- None, I only have ONE option
- Other (please specify)

24. What was the most recent illness for a person in the household? \*

25. Where did you USUALLY get medicine come from? \*

Government clinic/ hospital

Private doctor

Private clinic/ hospital

Pharmacy

Friend or neighbor

N/A

Other (please specify)

26. What was the most recent exotic medicine someone in your household used? \*

I have not used an exotic medicine recently

Yes, but I don't know the name

Yes, I have used the name is?

27. How many times has someone used antibiotics in your household in the last year?

0

1-3 times

4-6 times

7-10 times

Over 10 times



28. Where did you USUALLY get ANTIBIOTICS come from? \*

Government clinic/ hospital

Private doctor

Private clinic/ hospital

Pharmacy

Friend or neighbor

N/A

Other (please specify)

29. Are children less than 5 years old in the household currently vaccinated against one or more diseases? \*

Yes

No

No children under 5 years

30. How much time does it take to travel to the health center or hospital that you use (ONE WAY)?

Enter numbers. Only need to fill in one box.

minutes by foot

minutes by vehicle

31. How many visits to a health clinic or hospital were made by household members in the last 3 months (sum of everyone in house)? \*

- 0-1 time
- 2-4 times
- 5-10 times
- 11-20 times
- 20+ times

### Social - Household Information

---

32. How many dwellings? \*

Enter numbers.

- 1-3
- 3-6
- 7-10
- Over 10

33. Animal House

|                 | Yes                   | No                    |
|-----------------|-----------------------|-----------------------|
| Cattle          | <input type="radio"/> | <input type="radio"/> |
| Goats and Sheep | <input type="radio"/> | <input type="radio"/> |
| Chicken         | <input type="radio"/> | <input type="radio"/> |
| Dog             | <input type="radio"/> | <input type="radio"/> |

34. The house of the respondent is: \*

- On own land
- On communal land
- Other

35. Toilet location? \*

- Inside the house
- Outside the house
- Both
- None

36. What type of toilet? \*

- Flush toilet
- Pit toilet
- Trench
- Bush in dedicated location
- Bush in general
- Other

37. Electricity –Household inventory \*

- None
- Grid (this means a power line is connected to house)
- Off grid (but available via local production such as solar panels)

38. How many of these does your household have? \*

|                                  | 0                     | 1                     | 2                     | 3                     | 4                     | 5+                    |
|----------------------------------|-----------------------|-----------------------|-----------------------|-----------------------|-----------------------|-----------------------|
| Radio Functioning                | <input type="radio"/> | <input type="radio"/> | <input type="radio"/> | <input type="radio"/> | <input type="radio"/> | <input type="radio"/> |
| Television Functioning           | <input type="radio"/> | <input type="radio"/> | <input type="radio"/> | <input type="radio"/> | <input type="radio"/> | <input type="radio"/> |
| Refrigerator Functioning         | <input type="radio"/> | <input type="radio"/> | <input type="radio"/> | <input type="radio"/> | <input type="radio"/> | <input type="radio"/> |
| Bicycle : Functioning            | <input type="radio"/> | <input type="radio"/> | <input type="radio"/> | <input type="radio"/> | <input type="radio"/> | <input type="radio"/> |
| Motorcycle/Scooter : Functioning | <input type="radio"/> | <input type="radio"/> | <input type="radio"/> | <input type="radio"/> | <input type="radio"/> | <input type="radio"/> |
| Car/Truck : Functioning          | <input type="radio"/> | <input type="radio"/> | <input type="radio"/> | <input type="radio"/> | <input type="radio"/> | <input type="radio"/> |
| Cell Phone : Functioning         | <input type="radio"/> | <input type="radio"/> | <input type="radio"/> | <input type="radio"/> | <input type="radio"/> | <input type="radio"/> |
| Horse Cart: Functioning          | <input type="radio"/> | <input type="radio"/> | <input type="radio"/> | <input type="radio"/> | <input type="radio"/> | <input type="radio"/> |
| Plough : Functioning             | <input type="radio"/> | <input type="radio"/> | <input type="radio"/> | <input type="radio"/> | <input type="radio"/> | <input type="radio"/> |
| Syringe : Functioning            | <input type="radio"/> | <input type="radio"/> | <input type="radio"/> | <input type="radio"/> | <input type="radio"/> | <input type="radio"/> |
| Needles : Functioning            | <input type="radio"/> | <input type="radio"/> | <input type="radio"/> | <input type="radio"/> | <input type="radio"/> | <input type="radio"/> |
| M'kokoteli(Wheel Barrow)         | <input type="radio"/> | <input type="radio"/> | <input type="radio"/> | <input type="radio"/> | <input type="radio"/> | <input type="radio"/> |

39. Where do you get your water? **CHECK ALL THAT APPLY \***

- Communal well
- Private well
- River water
- Lake or water hole
- Rain water or seasonal stream
- Household Stand pipe
- Nieghbor Standpipe
- Pay for delivery
- Cistern
- Other (please specify)

40. Where do you usually get your water? \*

- Communal well
- Private well
- River water
- Lake or impoundment
- Rain water seasonal stream
- Household Stand pipe
- Neighbor Standpipe
- Pay for delivery
- Other (please specify)

41. Do livestock or wildlife drink from the same water source? For example, livestock and humans all drink from standpipe \*

- No, water only for people
- Livestock drink the same water
- Wildlife drink the same water
- Both livestock and wildlife drink the same water



44. Quantity of cow's milk consumed by household per day

|                      | Quantity                      |
|----------------------|-------------------------------|
| Home produced milk   | Quantity <input type="text"/> |
| Purchased milk       | Quantity <input type="text"/> |
| Home produced butter | Quantity <input type="text"/> |
| Purchased butter     | Quantity <input type="text"/> |
| Home produced eggs   | Quantity <input type="text"/> |
| Purchased eggs       | Quantity <input type="text"/> |

**Economic - Crop Enterprise, Land**

---

45. **FOR THE LAST HARVEST** what types of crops did you grow?

If NO CROPS, enter NA for at least one entry.

|        | Crop name                         | Area planted                         | Draught power used (Yes/No)                         | Draught power used (Type)                         | Fertilizer used (Yes/No)                         | Fertilizer used (Type)                         | Crop output use (Home Consumption)                         |
|--------|-----------------------------------|--------------------------------------|-----------------------------------------------------|---------------------------------------------------|--------------------------------------------------|------------------------------------------------|------------------------------------------------------------|
| Crop 1 | Crop name<br><input type="text"/> | Area planted<br><input type="text"/> | Draught power used (Yes/No)<br><input type="text"/> | Draught power used (Type)<br><input type="text"/> | Fertilizer used (Yes/No)<br><input type="text"/> | Fertilizer used (Type)<br><input type="text"/> | Crop output use (Home Consumption)<br><input type="text"/> |
| Crop 2 | Crop name<br><input type="text"/> | Area planted<br><input type="text"/> | Draught power used (Yes/No)<br><input type="text"/> | Draught power used (Type)<br><input type="text"/> | Fertilizer used (Yes/No)<br><input type="text"/> | Fertilizer used (Type)<br><input type="text"/> | Crop output use (Home Consumption)<br><input type="text"/> |
| Crop 3 | Crop name<br><input type="text"/> | Area planted<br><input type="text"/> | Draught power used (Yes/No)<br><input type="text"/> | Draught power used (Type)<br><input type="text"/> | Fertilizer used (Yes/No)<br><input type="text"/> | Fertilizer used (Type)<br><input type="text"/> | Crop output use (Home Consumption)<br><input type="text"/> |
| Crop 4 | Crop name<br><input type="text"/> | Area planted<br><input type="text"/> | Draught power used (Yes/No)<br><input type="text"/> | Draught power used (Type)<br><input type="text"/> | Fertilizer used (Yes/No)<br><input type="text"/> | Fertilizer used (Type)<br><input type="text"/> | Crop output use (Home Consumption)<br><input type="text"/> |
| Crop 5 | Crop name<br><input type="text"/> | Area planted<br><input type="text"/> | Draught power used (Yes/No)<br><input type="text"/> | Draught power used (Type)<br><input type="text"/> | Fertilizer used (Yes/No)<br><input type="text"/> | Fertilizer used (Type)<br><input type="text"/> | Crop output use (Home Consumption)<br><input type="text"/> |

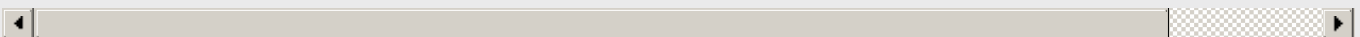



46. Total crop production expenditures for the most recent complete growing season  
If NO CROPS, enter 0 for at least one entry.

|                         | Cost (in TZS)                      |
|-------------------------|------------------------------------|
| Seed                    | Cost (in TZS) <input type="text"/> |
| Fertilizer              | Cost (in TZS) <input type="text"/> |
| Herbicide               | Cost (in TZS) <input type="text"/> |
| Pesticide               | Cost (in TZS) <input type="text"/> |
| Tractor Rental          | Cost (in TZS) <input type="text"/> |
| Other 1 (specify below) | Cost (in TZS) <input type="text"/> |
| Other 2 (specify below) | Cost (in TZS) <input type="text"/> |
| Other 3 (specify below) | Cost (in TZS) <input type="text"/> |

47. Did you lose 1/4 or more of your crops in the following years? \*

2014

Yes, I lost 1/4 of my crops  
Yes, I lost 1/2 of my crops  
Yes, I lost 3/4 of my crops  
Yes, I lost ALL of my crops  
No, I did not lose any crops  
No, I don't GROW ANY CROPS  
I don't remember

2013

Yes, I lost 1/4 of my crops  
Yes, I lost 1/2 of my crops  
Yes, I lost 3/4 of my crops  
Yes, I lost ALL of my crops  
No, I did not lose any crops  
No, I don't GROW ANY CROPS  
I don't remember

2012

Yes, I lost 1/4 of my crops  
Yes, I lost 1/2 of my crops  
Yes, I lost 3/4 of my crops  
Yes, I lost ALL of my crops  
No, I did not lose any crops  
No, I don't GROW ANY CROPS  
I don't remember

2011

Yes, I lost 1/4 of my crops  
Yes, I lost 1/2 of my crops  
Yes, I lost 3/4 of my crops  
Yes, I lost ALL of my crops  
No, I did not lose any crops  
No, I don't GROW ANY CROPS  
I don't remember

2010

Yes, I lost 1/4 of my crops  
Yes, I lost 1/2 of my crops  
Yes, I lost 3/4 of my crops  
Yes, I lost ALL of my crops  
No, I did not lose any crops  
No, I don't GROW ANY CROPS  
I don't remember

48. If you lost a 1/4 or more of your crops in the following years, what was the major reason? \*

2014

Drought  
Pests or Disease  
Bad Seeds or Not Enough Fertilizer  
Animals Ate  
Didn't take care of the field  
I don't have crops  
I didn't lose any crops that year  
I don't remember

2013

Drought  
Pests or Disease  
Bad Seeds or Not Enough Fertilizer  
Animals Ate  
Didn't take care of the field  
I don't have crops  
I didn't lose any crops that year  
I don't remember

2012

Drought  
Pests or Disease  
Bad Seeds or Not Enough Fertilizer  
Animals Ate  
Didn't take care of the field  
I don't have crops  
I didn't lose any crops that year  
I don't remember

2011

Drought  
Pests or Disease  
Bad Seeds or Not Enough Fertilizer  
Animals Ate  
Didn't take care of the field  
I don't have crops  
I didn't lose any crops that year  
I don't remember

2010

Drought  
Pests or Disease  
Bad Seeds or Not Enough Fertilizer  
Animals Ate  
Didn't take care of the field

I don't have crops  
I didn't lose any crops that year  
I don't remember

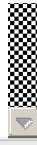

## Livestock Enterprise, Assets

---

### 49. Cattle

Enter numbers.

If NO CATTLE, enter 0 for at least one entry.

|                                                    | Adult<br>(Number)                         | Young<br>(Number)                         |
|----------------------------------------------------|-------------------------------------------|-------------------------------------------|
| Kept in a boma in homestead part of all of the day | Adult<br>(Number)<br><input type="text"/> | Young<br>(Number)<br><input type="text"/> |
| Moves in and out of the homestead                  | Adult<br>(Number)<br><input type="text"/> | Young<br>(Number)<br><input type="text"/> |
| Herded away from the homestead                     | Adult<br>(Number)<br><input type="text"/> | Young<br>(Number)<br><input type="text"/> |

### 50. Sheep & goats

Enter numbers.

If NO GOATS AND SHEEP, enter 0 for at least one entry.

|                                                    | Adult<br>(Number)                         | Young<br>(Number)                         |
|----------------------------------------------------|-------------------------------------------|-------------------------------------------|
| Kept in a boma in homestead part of all of the day | Adult<br>(Number)<br><input type="text"/> | Young<br>(Number)<br><input type="text"/> |
| Moves in and out of the homestead                  | Adult<br>(Number)<br><input type="text"/> | Young<br>(Number)<br><input type="text"/> |
| Herded away from the homestead                     | Adult<br>(Number)<br><input type="text"/> | Young<br>(Number)<br><input type="text"/> |

### 51. Donkeys

Enter numbers.

If NO DONKEYS, enter 0 for at least one entry.

|                                                    | Adult<br>(Number)                         | Young<br>(Number)                         |
|----------------------------------------------------|-------------------------------------------|-------------------------------------------|
| Kept in a boma in homestead part of all of the day | Adult<br>(Number)<br><input type="text"/> | Young<br>(Number)<br><input type="text"/> |
| Moves in and out of the homestead                  | Adult<br>(Number)<br><input type="text"/> | Young<br>(Number)<br><input type="text"/> |
| Herded away from the homestead                     | Adult<br>(Number)<br><input type="text"/> | Young<br>(Number)<br><input type="text"/> |

### 52. Pigs

Enter numbers.

If NO PIGS, enter 0 for at least one entry.

|       | Animals (Number)                         | Purchase in last year? If Yes, put number                      | Source of Purchase                         |
|-------|------------------------------------------|----------------------------------------------------------------|--------------------------------------------|
| adult | Animals (Number)<br><input type="text"/> | Purchase in last year? If Yes, put number <input type="text"/> | Source of Purchase<br><input type="text"/> |
| young | Animals (Number)<br><input type="text"/> | Purchase in last year? If Yes, put number <input type="text"/> | Source of Purchase<br><input type="text"/> |

### 53. Poultry system

|            | Birds (Number)                         | Housing?                         | Purchase in last year, if yes put #                         |
|------------|----------------------------------------|----------------------------------|-------------------------------------------------------------|
| Free range | Birds (Number)<br><input type="text"/> | Housing?<br><input type="text"/> | Purchase in last year, if yes put #<br><input type="text"/> |

### 54. number of eggs produced per flock/day? \*

Enter a number.

eggs/flock/day

### 55. Average amount of eggs sold by the household \*

Enter a number.

eggs per day

56. How many animals have you purchased in the last year? \*

Cattle

Sheep/goats

Donkeys

57. How many animals have you sold in the last year? \*

Cattle

Sheep/goats

Donkeys

58. Where do you sell cattle and small livestock? **(Check ALL that apply) \***

- Local market
- Regional market
- Neighbors
- Butcher/abattoir
- I don't sell cattle
- I don't own any cattle
- Other (specify)

59. When you sell livestock how far do you usually travel? \*

- 1 hour or less
- More than 1 hour less than 1 day
- More than 1 day
- More than 2 days
- N/A

60. When you purchase livestock how far do you usually travel? \*

- 1 hour or less
- More than 1 hour less than 1 day
- More than 1 day
- More than 2 days
- N/A

61. Does someone outside your household manage your livestock for you? \*

- Yes
- No



62. If someone else manages your livestock outside of your household, why? \*

- Too many to manage alone
- Other person needed livestock for milk
- N/A
- Other (specify)

63. How many animals do you currently manage for someone else? \*

Enter numbers for all that apply.

If none apply, enter 0 for at least one entry.

- Cattle
- Goats
- Sheep
- Donkeys
- Horses
- Other

64. Why are you keeping stock for someone else? (SKIP IF NOT KEEPING STOCK FOR SOMEONE ELSE) \*

- Owner had too many to manage alone
- Needed livestock for milk
- Kumharia
- N/A
- Other (specify)

65. How much land does the household graze and not share with other livestock holders for grazing? \*

Enter the number and the units.

Yes, write in number and units

\*

None

66. Does your family have access to common grazing land? \*

Yes

No

67. What factors keep you from increasing your herd size? (CHECK ALL THAT APPLY) \*

Lack of money

Lack of land

Lack of water

Lack of labor

Don't want any more

Too expensive to maintain

Disease limitations

N/A

Other (specify)

68. How often do your livestock come into contact with livestock from other villages/communities when grazing? \*

- Never
- Every day
- Once or more per week
- Once or more per month
- Less than once per month

## Cattle Management

---

69. How many times in a normal year do you move your livestock? \*

- 0
- 1
- 2
- 3
- 4
- 5
- 6+
- NA, I have no livestock

70. How many times do you move your livestock in a dry year? \*

- 0
- 1
- 2
- 3
- 4
- 5
- 6+
- NA, I have no livestock

71. How far do you move your livestock in a normal year? \*

- Less than one day walk
- One to two days
- Three to four days
- More than four days
- N/A

72. How far do you move your livestock in a dry year? \*

- Less than one day walk
- One to two days
- Three to four days
- More than four days
- N/A

73. Is this year a dry year, normal year, or wet year? \*

- Dry year
- Normal year
- Wet year

## **Economic - Livestock Health and Loss**

---

74. Did you lose one-quarter or more of your livestock in the following years? \*

For example, if their herd was 4 and they lost 1 cow or sheep then say "yes"

2014

Yes, I lost 1/4 of my herd  
Yes, I lost 1/2 of my herd  
Yes, I lost 3/4 of my herd  
Yes, I lost ALL of my herd  
No, I didn't lose more than 1/4  
No, I don't have any livestock  
I don't remember

2013

Yes, I lost 1/4 of my herd  
Yes, I lost 1/2 of my herd  
Yes, I lost 3/4 of my herd  
Yes, I lost ALL of my herd  
No, I didn't lose more than 1/4  
No, I don't have any livestock  
I don't remember

2012

Yes, I lost 1/4 of my herd  
Yes, I lost 1/2 of my herd  
Yes, I lost 3/4 of my herd  
Yes, I lost ALL of my herd  
No, I didn't lose more than 1/4  
No, I don't have any livestock  
I don't remember

2011

Yes, I lost 1/4 of my herd  
Yes, I lost 1/2 of my herd  
Yes, I lost 3/4 of my herd  
Yes, I lost ALL of my herd  
No, I didn't lose more than 1/4  
No, I don't have any livestock  
I don't remember

2010

Yes, I lost 1/4 of my herd  
Yes, I lost 1/2 of my herd  
Yes, I lost 3/4 of my herd  
Yes, I lost ALL of my herd  
No, I didn't lose more than 1/4  
No, I don't have any livestock  
I don't remember

75. If you lost 1/4 or more of your herds in the following years, what was the major reason? \*

2014

Drought  
Pests or Disease  
I did not lose 1/4 of my herd that year  
I don't have any livestock  
I don't remember

2013

Drought  
Pests or Disease  
I did not lose 1/4 of my herd that year  
I don't have any livestock  
I don't remember

2012

Drought  
Pests or Disease  
I did not lose 1/4 of my herd that year  
I don't have any livestock  
I don't remember

2011

Drought  
Pests or Disease  
I did not lose 1/4 of my herd that year  
I don't have any livestock  
I don't remember

2010

Drought  
Pests or Disease  
I did not lose 1/4 of my herd that year  
I don't have any livestock  
I don't remember



76. What animal health services do you use for livestock? **CHECK ALL THAT APPLY \***

- Ag extension officer
- Government vet
- Private vet
- Drug shop
- Indigenous healer
- None
- Other (specify)

77. Describe the most recent illness in your herd (SKIP IF NO RECENT ILLNESS)

|                  | Animal                                                            | Illness                                                            | Symptoms                                                            | Treatment                                                            | Duration                                                            | Number sick                                                            | Recovered                                                            |
|------------------|-------------------------------------------------------------------|--------------------------------------------------------------------|---------------------------------------------------------------------|----------------------------------------------------------------------|---------------------------------------------------------------------|------------------------------------------------------------------------|----------------------------------------------------------------------|
| Most recent      | Animal<br><input style="width: 50px; height: 20px;" type="text"/> | Illness<br><input style="width: 50px; height: 20px;" type="text"/> | Symptoms<br><input style="width: 50px; height: 20px;" type="text"/> | Treatment<br><input style="width: 50px; height: 20px;" type="text"/> | Duration<br><input style="width: 50px; height: 20px;" type="text"/> | Number sick<br><input style="width: 50px; height: 20px;" type="text"/> | Recovered<br><input style="width: 50px; height: 20px;" type="text"/> |
| Next most recent | Animal<br><input style="width: 50px; height: 20px;" type="text"/> | Illness<br><input style="width: 50px; height: 20px;" type="text"/> | Symptoms<br><input style="width: 50px; height: 20px;" type="text"/> | Treatment<br><input style="width: 50px; height: 20px;" type="text"/> | Duration<br><input style="width: 50px; height: 20px;" type="text"/> | Number sick<br><input style="width: 50px; height: 20px;" type="text"/> | Recovered<br><input style="width: 50px; height: 20px;" type="text"/> |

78. Are your animals vaccinated against any diseases? (SKIP IF NO ANIMALS ARE VACCINATED)

List for which diseases animals are vaccinated.

|            | Disease 1                         | Disease 2                         | Disease 3                         | Disease 4                         | Other diseases                         |
|------------|-----------------------------------|-----------------------------------|-----------------------------------|-----------------------------------|----------------------------------------|
| Cattle     | Disease 1<br><input type="text"/> | Disease 2<br><input type="text"/> | Disease 3<br><input type="text"/> | Disease 4<br><input type="text"/> | Other diseases<br><input type="text"/> |
| Smallstock | Disease 1<br><input type="text"/> | Disease 2<br><input type="text"/> | Disease 3<br><input type="text"/> | Disease 4<br><input type="text"/> | Other diseases<br><input type="text"/> |
| Dogs       | Disease 1<br><input type="text"/> | Disease 2<br><input type="text"/> | Disease 3<br><input type="text"/> | Disease 4<br><input type="text"/> | Other diseases<br><input type="text"/> |

79. Where do you get vaccines for livestock? \*

- Veterinarian
- Animal drug shop
- Agricultural extension
- Friends
- N/A, the HOUSEHOLD does not purchase vaccines
- Don't Know
- Other (specify)

80. Number of calves born dead in the last year from sick cows? \*

Enter a number.

81. Number of kids born dead in last year from sick mother? \*

Enter a number.

82. How do you dispose of a dead animal? \*

- Eat
- Skin and bury
- Bury without skinning
- Leave it
- Burn it
- Cook for dogs and pigs
- N/A

83. When you treat an animal do you use the milk or meat from it? \*

- Immediately
- After 3 days
- After 10 days
- When the animal is healthy
- N/A

84. Has sickness in your herd reduced the time available for other business/work in the last year? \*

- Yes
- No

85. Has any family member become sick or died because of eating product from sick animal? \*

- Yes
- No

### **Exotic Medicines for Livestock**

---

86. Do you keep exotic medicines FOR LIVESTOCK at home? \*

- Yes
- No

87. What exotic medicines **FOR LIVESTOCK** do you keep on hand at home?

|            | Medicine                         | Brand                         | Where it was purchased                         | When it was purchased                         | Use by date (EXPIRATION)                         |
|------------|----------------------------------|-------------------------------|------------------------------------------------|-----------------------------------------------|--------------------------------------------------|
| Medicine 1 | Medicine<br><input type="text"/> | Brand<br><input type="text"/> | Where it was purchased<br><input type="text"/> | When it was purchased<br><input type="text"/> | Use by date (EXPIRATION)<br><input type="text"/> |
| Medicine 2 | Medicine<br><input type="text"/> | Brand<br><input type="text"/> | Where it was purchased<br><input type="text"/> | When it was purchased<br><input type="text"/> | Use by date (EXPIRATION)<br><input type="text"/> |
| Medicine 3 | Medicine<br><input type="text"/> | Brand<br><input type="text"/> | Where it was purchased<br><input type="text"/> | When it was purchased<br><input type="text"/> | Use by date (EXPIRATION)<br><input type="text"/> |
| Medicine 4 | Medicine<br><input type="text"/> | Brand<br><input type="text"/> | Where it was purchased<br><input type="text"/> | When it was purchased<br><input type="text"/> | Use by date (EXPIRATION)<br><input type="text"/> |
| Medicine 5 | Medicine<br><input type="text"/> | Brand<br><input type="text"/> | Where it was purchased<br><input type="text"/> | When it was purchased<br><input type="text"/> | Use by date (EXPIRATION)<br><input type="text"/> |
| Medicine 6 | Medicine<br><input type="text"/> | Brand<br><input type="text"/> | Where it was purchased<br><input type="text"/> | When it was purchased<br><input type="text"/> | Use by date (EXPIRATION)<br><input type="text"/> |
| Medicine 7 | Medicine<br><input type="text"/> | Brand<br><input type="text"/> | Where it was purchased<br><input type="text"/> | When it was purchased<br><input type="text"/> | Use by date (EXPIRATION)<br><input type="text"/> |
| Medicine 8 | Medicine<br><input type="text"/> | Brand<br><input type="text"/> | Where it was purchased<br><input type="text"/> | When it was purchased<br><input type="text"/> | Use by date (EXPIRATION)<br><input type="text"/> |

88. Where do you get exotic medicines for livestock? \*

- Veterinarian
- Animal drug shop
- Agricultural extension
- Friends
- N/A, the HOUSEHOLD does not purchase exotic medicines
- Other (specify)

### **Cattle Sickness**

---

89. What do you do to avoid disease/outbreak in livestock? **CHECK ALL THAT APPLY \***  
Select all that apply.

- Keep calves separate
- Make a shed or pen to prevent contact from other domestic and wild animals
- Keep new cattle separately
- Graze sick cattle separately
- Feed supplementation
- Buy new cattle from local area
- Vaccination
- Treatment (Animal Health)
- Treatment (traditional)
- Spraying
- Do nothing
- Other (specify)

90. Do you change where you graze when your livestock to avoid sickness? \*

- Yes
- No
- N/A, I don't have any cows
- N/A, my cows are zero grazing

91. Do you ever give your livestock medicine? \*

- Yes, I give them exotic and traditional medicine
- Yes, but I only give them traditional medicine NOT exotic medicine
- Yes, but I only give them exotic medicine NOT traditional medicine
- No, I do not give them any medicine.

92. How much do you use per dose for a full grown cow?

|             | Length of treatment (days)                      | dose for adult cow                      | Don't Know, Vet gives drugs                      |
|-------------|-------------------------------------------------|-----------------------------------------|--------------------------------------------------|
| Pen-strep   | Length of treatment (days) <input type="text"/> | dose for adult cow <input type="text"/> | Don't Know, Vet gives drugs <input type="text"/> |
| Basulfa     | Length of treatment (days) <input type="text"/> | dose for adult cow <input type="text"/> | Don't Know, Vet gives drugs <input type="text"/> |
| Bamisola    | Length of treatment (days) <input type="text"/> | dose for adult cow <input type="text"/> | Don't Know, Vet gives drugs <input type="text"/> |
| Dininabazen | Length of treatment (days) <input type="text"/> | dose for adult cow <input type="text"/> | Don't Know, Vet gives drugs <input type="text"/> |
| Parvexon    | Length of treatment (days) <input type="text"/> | dose for adult cow <input type="text"/> | Don't Know, Vet gives drugs <input type="text"/> |
| Alfamec     | Length of treatment (days) <input type="text"/> | dose for adult cow <input type="text"/> | Don't Know, Vet gives drugs <input type="text"/> |
| Ivermectine | Length of treatment (days) <input type="text"/> | dose for adult cow <input type="text"/> | Don't Know, Vet gives drugs <input type="text"/> |
| Inomazene   | Length of treatment (days) <input type="text"/> | dose for adult cow <input type="text"/> | Don't Know, Vet gives drugs <input type="text"/> |



93. Does anyone in the household milk cows \*

Yes

No

94. How much milk do you get from **ONE COW** in the

Dry Season

Under 1 liter  
1 liter  
1-2 liter  
2 liters  
more than 2 liters

Wet Season

Under 1 liter  
1 liter  
1-2 liter  
2 liters  
more than 2 liters

95. How many cows does THE HOUSEHOLD milk in the

HOUSEHOLD INCLUDES ALL WIVES

Dry Season

1-2  
2-4  
5-10  
11-20  
21-40  
41-60  
Over 60

Wet Season

1-2  
2-4  
5-10  
11-20  
21-40  
41-60  
Over 60

96. Average amount of cow milk sold by the household \*

Enter a number.

number of liters/day

97. Average amount of butter sold by the household \*

Enter a number.

liters/ market day

98. Does the household milk goats/sheep \*

Yes

No

99. How much milk do you get from **ONE GOAT/SHEEP** in the:

Dry Season

Under 1 liter  
1 liter  
1-2 liter  
2 liters  
more than 2 liters

Wet Season

Under 1 liter  
1 liter  
1-2 liter  
2 liters  
more than 2 liters

100. How many goats/sheep does THE HOUSEHOLD milk in the

HOUSEHOLD INCLUDES ALL WIVES

Dry Season

1-2  
2-4  
5-10  
11-20  
21-40  
41-60  
Over 60

Wet Season

1-2  
2-4  
5-10  
11-20  
21-40  
41-60  
Over 60

101. Average amount of goat milk sold by the household \*

Enter a number.

liters/ day

102. Where do you normally sell milk or butter?

- Local market
- Regional market
- Neighbors
- Shop keeper
- N/A
- Other (specify)

103. Select YES if anyone in the household milk cows OR goats/sheep

- Yes
- No

104. How many times a day do you milk cows or goats?

- 1
- 2
- 3
- 4 or more

105. Do you clean the enyewa of the cows/sheep/goats before milking?

- Yes
- No

106. Do you DRINK/COOK with MILK from? \*

SICK COWS

Yes  
No  
N/A, I don't have any milk producing livestock

SICK GOATS/SHEEP

Yes  
No  
N/A, I don't have any milk producing livestock

107. Do you SELL MILK from? \*

SICK COWS

Yes  
No  
N/A, I don't have any milk producing livestock

SICK GOATS/SHEEP

Yes  
No  
N/A, I don't have any milk producing livestock

108. Do you stop selling or consuming milk during treatment with exotic medicines? \*

- Yes
- No
- N/A

109. Is there a decrease in milk production from sick cows compared to healthy cows? \*

- Yes
- No
- No milking of sick cows
- N/A , I don't have any cows

110. Referring to the previous question, If yes, by how much? (SKIP IF NO DECREASE IN MILK PRODUCTION) \*

Enter a number.

liters/day

111. Do you have separate COLLECTION CONTAINERS for DIFFERENT COWS/SHEEP? GOATS?

- YES, each animal has a different container
- NO, I use the same container for many animals
- No, I only have ONE milking animal

112. If one of your milking animals is sick, do you stop milking and clean the collection container BEFORE milking any other animals?

- Yes, every time
- Yes, but only some of the times
- No

113. How often do you clean your calabash/container used for COLLECTING cow and sheep milk

- Only in the morning
- Only in the evening
- In the morning and in the evening
- A few times per week
- I never clean my collection containers

114. What do you clean your milk containers with? **CHECK ALL THAT APPLY**

|                       | Water                    | Cow Urine                |
|-----------------------|--------------------------|--------------------------|
| Collection Containers | <input type="checkbox"/> | <input type="checkbox"/> |
| Storage Containers    | <input type="checkbox"/> | <input type="checkbox"/> |

115. What CONTAINER do you STORE milk in? **CHECK ALL THAT APPLY**

Calabash

Plastic Container

Metal Pots

Other (required)  \*

116. How many hours do you USUALLY store milk after morning or evening milking before it is all gone?

Under 1 hr

1-2

3-4

5-7

8-12

12-24

More than one day

117. How many times do you bring the milk to boil?

1

2

3

4

Over 4



118. Do you boil milk before putting in calabash to make sour milk?

- Yes, always
- Yes, but only some of the itme
- No, I do not boil the milk
- I do not make sour milk

119. How many days do you keep sour milk before cleaning the calabash?

- Under 1 day
- About 1 day
- 1-2 days
- 3-4 days
- 5-6 days
- A week or more
- I do not make sour milk

120. If you do not boil all of the milk, why do you not boil all of the milk? **CHECK ALL THAT APPLY**

- I do not boil the milk I sell
- Boiled milk tastes bad
- Boiled milk hurts the vitamines in milk
- I do not boil milk
- Other (required)  \*



125. How long do you cook the porridge for dogs?

- Under 5 minutes
- 5-10 minutes
- over 10 minutes

126. Do you cook your porridge for dogs FOR LESS time than you cook porridge for humans?

- Yes
- No

127. If you cook porridge for dogs FOR LESS time, why?

128. If you don't drink milk from sick cows, do you still give it to dogs?

- Yes
- No

129. Have you ever seen dogs EAT the poop of. **CHECK ALL THAT APPLY**

- Humans
- Other Dogs
- Cattle
- Sheep/Goat

130. In the last year, how many DIFFERENT people did you RECEIVE livestock from. This includes buying, loans, marriage payments, and gifts \*

131. In the last year, about how many DIFFERENT people did you GIVE livestock to. This includes selling, loans, marriage payments, and gifts \*

132. Please think about the last three times you BOUGHT OR SOLD cattle, who did you BUY or SELL them too \*

Exchange 1

  
  
  

Exchange 2

  
  
  

Exchange 3

133. List up to 3 water sources your livestock use in a year.

|         | Name of Source                      |
|---------|-------------------------------------|
| Water A | Name of Source <input type="text"/> |
| Water B | Name of Source <input type="text"/> |
| Water C | Name of Source <input type="text"/> |

134. How often do your livestock use the sources

|         |                                                                                                                                                        |
|---------|--------------------------------------------------------------------------------------------------------------------------------------------------------|
| Water A | <input type="text" value="almost everyday"/><br><input type="text" value="almost once per week"/><br><input type="text" value="about once per month"/> |
| Water B | <input type="text" value="almost everyday"/><br><input type="text" value="almost once per week"/><br><input type="text" value="about once per month"/> |
| Water C | <input type="text" value="almost everyday"/><br><input type="text" value="almost once per week"/><br><input type="text" value="about once per month"/> |

135. Do your livestock come in contact with other livestock at these sources

Water A

- Yes, many other animals
- Yes, but only a few households
- No, this source is in the household
- No, I take water from source and bring to cattle

Water B

- Yes, many other animals
- Yes, but only a few households
- No, this source is in the household
- No, I take water from source and bring to cattle

Water C

- Yes, many other animals
- Yes, but only a few households
- No, this source is in the household
- No, I take water from source and bring to cattle

136. List up to 3 markets you have bought livestock at

|          | Name of Source                      |
|----------|-------------------------------------|
| Market A | Name of Source <input type="text"/> |
| Market B | Name of Source <input type="text"/> |
| Market C | Name of Source <input type="text"/> |

137. For the year, how many cattle did you BUY at the market

Market A

0  
1  
2-4  
5-10  
10-30  
31-50  
Over 50

Market B

0  
1  
2-4  
5-10  
10-30  
31-50  
Over 50

Market C

0  
1  
2-4  
5-10  
10-30  
31-50  
Over 50

138. For the year, how many cattle did you SELL at the market

Market A

0  
1  
2-4  
5-10  
10-30  
31-50  
Over 50

Market B

0  
1  
2-4  
5-10  
10-30  
31-50  
Over 50

Market C

0  
1  
2-4  
5-10  
10-30  
31-50  
Over 50

### Information on wage labor

---

139. In the last three years, has anyone in the household been employed in wage labor? This means the person is paid at an hourly rate \*

- Yes
- NO



140. Please think of the last three people IN THE HOUSEHOLD who worked wage labor.  
Who?

Person 1

- No person has worked wage labor
- Household Head
- Spouse of Household Head
- Child of household head
- Sibling of Household Head
- Parents of Household Head
- Cousin
- Friend

Person 2

- No person has worked wage labor
- Household Head
- Spouse of Household Head
- Child of household head
- Sibling of Household Head
- Parents of Household Head
- Cousin
- Friend

Person 3

- No person has worked wage labor
- Household Head
- Spouse of Household Head
- Child of household head
- Sibling of Household Head
- Parents of Household Head
- Cousin
- Friend

141. Where did the people go for wage labor?

Person 1

close to the village  
In an urban area  
many kilometers away

Person 2

close to the village  
In an urban area  
many kilometers away

Person 3

close to the village  
In an urban area  
many kilometers away

142. How long did the people work in wage labor?

Person 1

A few weeks  
A few months  
Many months

Person 2

A few weeks  
A few months  
Many months

Person 3

A few weeks  
A few months  
Many months

143. What type of wage labor did the person do. For example, security, work for tourist company, get paid to weed field

Person 1

Person 2

Person 3

144. In the last three years, has anyone in the household made money from self-employment, such as boda-boda, selling charcoal, or selling matunda from garden? \*

Yes

NO

145. Please think of the last three people IN THE HOUSEHOLD who worked self-employed. Who were they?

Person 1

- Household Head
- Spouse of Household Head
- Child of household head
- Sibling of Household Head
- Parents of Household Head
- Cousin
- Friend

Person 2

- Household Head
- Spouse of Household Head
- Child of household head
- Sibling of Household Head
- Parents of Household Head
- Cousin
- Friend

Person 3

- Household Head
- Spouse of Household Head
- Child of household head
- Sibling of Household Head
- Parents of Household Head
- Cousin
- Friend

146. What type of self-employment did the person do? For example, drive a boda-boda, sell charcoal, or or vegetables/eggs from garden

Person 1

Person 2

Person 3

147. In the last three years, has anyone IN THE HOUSEHOLD made money from salary labor? Salary Labor means paid per month, for example, working for the government \*

- Yes
- NO

148. Please think of the last three people who worked salary labor IN THE HOUSEHOLD, who were they?

Person 1

No person has worked in salary labor  
Household Head  
Spouse of Household Head  
Child of household head  
Sibling of Household Head  
Parents of Household Head  
Cousin  
Friend

Person 2

No person has worked in salary labor  
Household Head  
Spouse of Household Head  
Child of household head  
Sibling of Household Head  
Parents of Household Head  
Cousin  
Friend

Person 3

No person has worked in salary labor  
Household Head  
Spouse of Household Head  
Child of household head  
Sibling of Household Head  
Parents of Household Head  
Cousin  
Friend

149. How often do the people work in salary labor?

Person 1

A few weeks  
A few months  
Many months

Person 2

A few weeks  
A few months  
Many months

Person 3

A few weeks  
A few months  
Many months

150. What type of salary labor did the person do. For example, work for government or NGO

Person 1

Person 2

Person 3

151. Has any person working in SALARY or WAGE LABOR AWAY FROM THE VILLAGE, sent money back to the household? \*

Person 1

- No person has sent back money
- Household Head
- Spouse of Household Head
- Child of household head
- Sibling of Household Head
- Parents of Household Head
- Cousin
- Friend

Person 2

- No person has sent back money
- Household Head
- Spouse of Household Head
- Child of household head
- Sibling of Household Head
- Parents of Household Head
- Cousin
- Friend

Person 3

- No person has sent back money
- Household Head
- Spouse of Household Head
- Child of household head
- Sibling of Household Head
- Parents of Household Head
- Cousin
- Friend

152. If someone working in wage or salary labor away from household sent money home, how often did they send home?

|          |                                                                                                                                                           |
|----------|-----------------------------------------------------------------------------------------------------------------------------------------------------------|
| Person 1 | <input type="text" value="almost every week"/><br><input type="text" value="almost every month"/><br><input type="text" value="only a few times a year"/> |
| Person 2 | <input type="text" value="almost every week"/><br><input type="text" value="almost every month"/><br><input type="text" value="only a few times a year"/> |
| Person 3 | <input type="text" value="almost every week"/><br><input type="text" value="almost every month"/><br><input type="text" value="only a few times a year"/> |

153. What is the total household wage income per month on average from labor, INCLUDING WAGE, SALARY. SMALL BUSINESS and NOT from livestock or crops? \*

Enter a number.

- 0
- 1- 25,000
- 25,000-100,000
- 100,000-200,000
- 200,000-400,000
- 400,000-700,000
- 700,000-1,000,000
- Over 1 million
- Does not want to answer
- Does not know



154. Does any household member maintain a savings account? \*

- Bank
- Mpesa
- None

155. What is the current household savings balance? (SKIP IF NO BANKING ACCOUNT) \*

Enter a number.

- 0
- 1- 25,000
- 25,000-100,000
- 100,000-200,000
- 200,000-400,000
- 400,000-700,000
- 700,000-1,000,000
- Over 1 million
- Does not want to answer
- Does not know

156. In the LAST YEAR did you receive any support for feeding the household from any NGO/Government? \*

- Yes, write in name of source (agency, NGO)

- No

157. Has any household member taken a **loan or loans** in the last 2 years? \*

- Yes
- No
- Don't know

158. Why were the loan (s) taken? **CHECK ALL THAT APPLY** \*

- Buy food
- Housing
- Transportation
- School fees
- Health care
- Livestock purchase
- Business
- N/A
- Other

## Diversification

---

159. In the last 3 years, have you changed **the size** of your herd or **species composition** because of changes in the environment, such as climate changes. \*

- Yes
- No
- No, I did not own any livestock in the past three years

160. In the last 3 years, have you increased the amount of livestock you sold? \*

- Yes
- No
- No, I did not own any livestock in last three years

161. In the last 3 years, have you changed the types of crops you grow because of climate changes or to make more money? \*

- Yes, because of climate change
- Yes, to make more money
- Yes, because of climate change AND money
- No
- No, I did not have any crops in last 3 years

162. In the last 3 years, have you increased inputs (fertilizer, labor) to increase agricultural output (yield)? \*

- Yes
- No
- No, I did not have any crops in last 3 years

## Diversification

---

163. In the Last Year What percent of household income was from Livestock and Crops OR Labor/Assistance \*

- 100% Livestock and Crops
- 90% Livestock and Crops and 10% Labor
- 75% Livestock and Crops and 25% Labor
- 50% Livestock and Crops and 50% Labor
- 25% Livestock and Crops and 75% Labor
- 10% Livestock and Crops and 90% Labor
- 100% Labor and assistance

164. From the money earned by livestock and crops, what percent is from livestock and from crops \*

- 100% Livestock
- 90% Livestock and 10% Crops
- 75% Livestock and 25% Crops
- 50% Livestock and 50% Crops
- 25% Livestock and 75% Crops
- 10% Livestock and 90% Crops
- 100% Crops
- NA, I get ALL income from Labor/Assistance

**VERIFY**

---

165. Did you get a GPS point and label the point the household id number \*

- Yes
- NO

166. Did you get a milk sample (fresh, sour, cattle and goat) if they have this milk? If they did have milk, make sure you put ID Number, Date, Time the Milking (morning or evening), Time you collected, and Type of Container used (calabash, plastic container) \*

- Yes
- No

167. Did you get poop samples (human, cattle, sheep, dog, chicken, donkey) and make sure to put ID, DATE, Time of COLLECTION, Species and OPEN/ENCLOSURE? \*

- Yes
- No

**Original Letter of Transmittal**

**[Click here to download Necessary Additional Data: Letter of transmittal EEID.pdf](#)**
